# Supplementary material for: Genomic and Metabolomic Analyses of the Medicinal Fungus Inonotus hispidus for Its Metabolite’s Biosynthesis and Medicinal Application
Source: MDPI journal article supplement (doi:10.3390/jof8121245), 2022-11-25
Supplement: s1 [file s1]

# **Genomic and metabolomic analyses of the medicinal fungus *Inonotus hispidus* for its metabolite's biosynthesis and medicinal application**

**Rui-qi Zhang<sup>1</sup>, Xi-long Feng<sup>1</sup>, Zhen-xin Wang<sup>1</sup>, Tian-chen Xie<sup>1</sup>, Yingce Duan<sup>2</sup>, Chengwei Liu<sup>2</sup>  
Jin-ming Gao<sup>1</sup> and Jianzhao Qi<sup>1\*</sup>**

1 Shaanxi Key Laboratory of Natural Products & Chemical Biology, College of Chemistry & Pharmacy,  
Northwest A&F University, Yangling 712100, China

2 Key Laboratory for Enzyme and Enzyme-Like Material Engineering of Heilongjiang, College of Life Science,  
Northeast Forestry University, Harbin 150040, China

\* Correspondence: [qjz@nwafu.edu.cn](mailto:qjz@nwafu.edu.cn)

## Content

|                                                                                                                                            |    |
|--------------------------------------------------------------------------------------------------------------------------------------------|----|
| Table S1. Genome size estimation for <i>I. hispidus</i> NPCB_001.....                                                                      | 1  |
| Table S2. Statistics of Oxford Nanopore PromethION sequencing data volume of <i>I. hispidus</i> NPCB_001 genome.....                       | 2  |
| Table S3. Statistics of Illumina NovaSeq sequencing data volume information of <i>I. hispidus</i> NPCB_001 genome.....                     | 3  |
| Table S4. Statistics of Illumina NovaSeq sequencing data mapping of <i>I. hispidus</i> NPCB_001 genome.....                                | 4  |
| Table S5. Annotation Statistics of <i>I. hispidus</i> NPCB_001 coding gene.....                                                            | 5  |
| Table S6. Statistics of non-coding RNA annotation results in <i>I. hispidus</i> NPCB_001 genome.....                                       | 6  |
| Table S7. Statistics of <i>I. hispidus</i> NPCB_001 repetitive sequence annotation results.....                                            | 7  |
| Table S8. Statistics of <i>I. hispidus</i> NPCB_001 protein-coding gene annotation.....                                                    | 8  |
| Table S9. Candidate genes for mating type in <i>I. hispidus</i> NPCB_001 genome.....                                                       | 9  |
| Table S10. The source (URL) statistics for 47 representative Basidiomycetes used to phylogenetic analysis.....                             | 10 |
| Table S11. The source (URL) statistics for white-rot fungi used to analysis CAZymes.....                                                   | 12 |
| Table S12. The 31 candidate genes for polysaccharide biosynthesis screened in the database.....                                            | 14 |
| Table S13. The candidate genes for polysaccharide biosynthesis in <i>I. hispidus</i> NPCB_001 genome.....                                  | 15 |
| Table S14. Terpenoid biosynthesis related enzymes in <i>I. hispidus</i> NPCB_001.....                                                      | 17 |
| Table S15. Identify matrix of Eight STSs from <i>I. hispidus</i> NPCB_001.....                                                             | 18 |
| Table S16. NRPS-like biosynthesis related enzymes in <i>I. hispidus</i> NPCB_001 genome.....                                               | 19 |
| Table S17. The 46 identified NRPS-likes from fungi used in cluster analysis.....                                                           | 20 |
| Table S18. Sequence homology analysis for two PKSs from <i>I. hispidus</i> NPCB_001.....                                                   | 21 |
| Table S19. The 22 identified PKS from Basidiomycetes used in cluster analysis.....                                                         | 22 |
| Table S20. Identification of cytochrome P450 genes in <i>I. hispidus</i> NPCB_001 genome.....                                              | 23 |
| Figure S1. ITS alignment of the strain NPCB_001.....                                                                                       | 27 |
| Figure S2. K-mer Depth and K-mer Species Frequency Distribution Plot.....                                                                  | 28 |
| Figure S3. Species distribution map of Nr database alignment to sequences.....                                                             | 29 |
| Figure S4. Statistical map of functional annotation classification based on Gene Ontology database.....                                    | 30 |
| Figure S5. Statistical Chart of COG Functional Annotated Classification.....                                                               | 31 |
| Figure S6. KEGG Pathway Functional Classification Chart.....                                                                               | 32 |
| Figure S7. Domain annotation based on the Pfam database.....                                                                               | 33 |
| Figure S8. Annotation of the terpenoid backbone biosynthesis of NPCB_001 using KAAS.....                                                   | 34 |
| Figure S9. Functional analysis of NRPS and comparative analysis of the BGCs involved.....                                                  | 35 |
| Figure S10. P450s Cluster analysis of the strain <i>I. hispidus</i> NPCB_001 and other Basidiomycetes.....                                 | 36 |
| Figure S11. Molecular network analysis of metabolites from the mycelium and fruiting bodies of the strain <i>I. hispidus</i> NPCB_001..... | 37 |
| Figure S12. The LC-ESI-HRMS and LC-ESI-HRMS/MS spectrums of isolates from the strain <i>I. hispidus</i> NPCB_001.....                      | 40 |
| Reference .....                                                                                                                            | 41 |

**Table S1. Genome size estimation for *I. hispidus* NPCB\_001.**

| Item                  | Number        |
|-----------------------|---------------|
| Heterozygosity        | 0.922%        |
| Genome Haploid Length | 33,688,229 bp |
| Genome Repeat Length  | 8,699,429 bp  |
| Genome Unique Length  | 24,988,801 bp |
| Model Fit             | 96.598%       |
| Read Error Rate       | 0.051%        |

**Genome Haploid Length** is genome size, **Genome Repeat Length** is the length of repeat sequences, **Genome Unique Length** is the length of non-repeated sequences, **Read Error Rate** is read error rate.

**Table S2. Statistics of Oxford Nanopore PromethION sequencing data volume of *I. hispidus* NPCB\_001 genome.**

| <b>Rank</b> | <b>Flag</b> | <b>TotalBase</b> | <b>TotalReads</b> | <b>MaxLen</b> | <b>AvgLen</b> | <b>N50</b> | <b>L50</b> | <b>N90</b> | <b>L90</b> | <b>meanQ</b> |
|-------------|-------------|------------------|-------------------|---------------|---------------|------------|------------|------------|------------|--------------|
| 0           | all         | 8,044,663,434    | 1,481,781         | 280,975       | 5,429.05      | 23,187     | 98,450     | 1,803      | 689,957    | 11.30        |
| 0           | pass        | 7,813,963,986    | 1,427,135         | 173,179       | 5,475.28      | 23,402     | 95,157     | 1,815      | 662,852    | 11.49        |
| 0           | fail        | 230,699,448      | 54,646            | 280,975       | 4,221.7       | 15,682     | 3,492      | 1,500      | 27,513     | 6.27         |
| 5000        | all         | 6,097,918,399    | 288,273           | 280,975       | 21,153.27     | 32,182     | 62,976     | 9,053      | 196,294    | 11.39        |
| 5000        | pass        | 5,938,786,064    | 279,676           | 173,179       | 21,234.52     | 32,292     | 61,191     | 9,102      | 190,325    | 11.55        |
| 5000        | fail        | 159,132,335      | 8,597             | 280,975       | 18,510.21     | 28,266     | 1,813      | 7,776      | 6,021      | 6.28         |
| 10000       | all         | 5,380,194,634    | 184,944           | 280,975       | 29,090.93     | 35,650     | 52,381     | 15,265     | 141,597    | 11.45        |
| 10000       | pass        | 5,246,124,614    | 179,965           | 173,179       | 29,150.8      | 35,725     | 50,995     | 15,305     | 137,759    | 11.59        |
| 10000       | fail        | 134,070,020      | 4,979             | 280,975       | 26,927.09     | 32,372     | 1,397      | 14,037     | 3,850      | 6.27         |
| 50000       | all         | 1,420,567,847    | 22,174            | 280,975       | 64,064.57     | 62,677     | 9,379      | 51,988     | 19,388     | 11.51        |
| 50000       | pass        | 1,390,757,850    | 21,712            | 173,179       | 64,054.8      | 62,705     | 9,187      | 51,984     | 18,984     | 11.62        |
| 50000       | fail        | 29,809,997       | 462               | 280,975       | 64,523.8      | 61,736     | 193        | 52,232     | 404        | 6.26         |
| 100000      | all         | 57,844,930       | 510               | 280,975       | 113,421.43    | 109,354    | 233        | 101,465    | 453        | 10.85        |
| 100000      | pass        | 55,687,999       | 494               | 173,179       | 112,728.74    | 109,273    | 227        | 101,426    | 439        | 11.02        |
| 100000      | fail        | 2,156,931        | 16                | 280,975       | 134,808.18    | 130,776    | 7          | 104,804    | 14         | 5.78         |

**Rank** is the gradient of data length, **0** is that all data; **Flag** is data type, **all** is all sequencing data, **pass** is effective sequencing data, **fail** is filtration data; **TotalBase** is the number of base; **TotalReads** is the number of reads; **MaxLen** is maximum length of data; **AvgLen** is average length of data; **N50** is N50 of data, all reads are summed in order from long to short, and when additive length up to half of all reads total length, the last read length added is N50; **L50** is L50 of data, all reads are accumulated in turn ranking in order from long to short, when additive length up to half of all reads total length, the number of sequences is L50; **N90** is N90 of data, algorithm the same as N50; **L90** is L90 of data, algorithm the same as L50; **meanQ** is mean quality value.

**Table S3. Statistics of Illumina NovaSeq sequencing data volume information of *I. hispidus* NPCB\_001 genome.**

| <b>Sample_name</b> | <b>Total_reads</b> | <b>Total_bases</b> | <b>GC_content</b> | <b>Q20</b> | <b>Q30</b> |
|--------------------|--------------------|--------------------|-------------------|------------|------------|
| rawdata            | 38,199,760         | 5,729,964,000      | 47.76%            | 97.85%     | 93.72%     |
| cleandata          | 38,199,760         | 5,729,964,000      | 47.76%            | 97.85%     | 93.72%     |

**Sample name** is data type; **Total\_reads** is sequencing reads number; **Total\_bases** is total sequencing base number; **GC\_Content** is G/C base number as a percentage of total base number; **Q20**、**Q30** respectively are Phred value greater than 20、30 base as a percentage of total base.

**Table S4. Statistics of Illumina NovaSeq sequencing data mapping of *I. hispidus* NPCB\_001 genome.**

| <b>Type</b>   | <b>Number</b> |
|---------------|---------------|
| map_rate      | 97.91%        |
| Average_depth | 163.36        |
| Coverage      | 99.86%        |

**map\_rate** is Illumina NovaSeq sequencing data mapping rates; **Average\_depth** is average coverage depth; **Coverage** is coverage rate.

**Table S5. Annotation Statistics of *I. hispidus* NPCB\_001 coding gene.**

| <b>Type</b>                  | <b>Number</b> |
|------------------------------|---------------|
| the total number of gene     | 12,304        |
| the average of mRNA_length   | 1,816.15      |
| the average of cds_length    | 1,434.49      |
| the average of exon_number   | 6.40          |
| the average of exon_length   | 224.07        |
| the average of intron_length | 70.65         |
| the total number of exon     | 78,769        |
| the total number of intron   | 66,465        |
| the total intron length      | 4,695,439     |

**the total number of gene** is the total number of genes; **the average of mRNA\_length** is the average length of mRNA; **the average of cds\_length** is the average length of CDS; **the average of exon\_number** is the average number of exons per gene. **the average of exon\_length** is the average exon length; **the average of intron\_length** is the average intron length; **the total number of exon** is the total number of exons; **the total number of intron** is the total number of introns; **the total intron length** is the total intron length.

**Table S6. Statistics of non-coding RNA annotation results in *I. hispidus* NPCB\_001 genome.**

| <b>Class</b> | <b>number</b> | <b>totalLen(bp)</b> | <b>meanLen(bp)</b> |
|--------------|---------------|---------------------|--------------------|
| rRNA         | 14            | 25,246              | 1,803              |
| sRNA         | 1             | 344                 | 344                |
| snRNA        | 16            | 1,962               | 122                |
| tRNA         | 105           | 8,353               | 79                 |

rRNA is ribosomal RNA; tRNA is transport RNA; sRNA is small regulatory RNA; snRNA is nucleolar small RNA. **totalLen** and **meanLen** are the total length and mean length.



**Table S7. Statistics of *I. hispidus* NPCB\_001 repetitive sequence annotation results.**

| Item           | Subfamily | Number | Length(bp) | Coverage |
|----------------|-----------|--------|------------|----------|
| SINE           | /         | 2      | 162        | 0.00%    |
| LINE           | /         | 233    | 20,701     | 0.06%    |
| LTR            | /         | 1,384  | 747,007    | 2.20%    |
| LTR            | Gypsy     | 1,076  | 656,064    | 1.93%    |
| LTR            | Copia     | 226    | 85,202     | 0.25%    |
| DNA            | /         | 407    | 77,360     | 0.23%    |
| Satellite      | /         | 7      | 486        | 0.00%    |
| Simple_repeat  | /         | 5,023  | 201,468    | 0.59%    |
| Low_complexity | /         | 857    | 40,901     | 0.12%    |
| Other          | /         | 40     | 8,243      | 0.02%    |
| Unknown        | /         | 34     | 7,413      | 0.02%    |
| Total          | /         | 7,987  | 1,100,314  | 3.23%    |

**SINE** is short scattered element; **LINE** is Long scattered element; **LTR** is long terminal repetition, mainly include two types, Gypsy and Copia; **DNA** is transposons; **Satellite** is satellite repetitive sequence; **Low\_complexity** is Low\_complexity repetition; **Other** is other types repetition; **Unknown** is unknown repetitive sequence; **Total** is total repetitive sequence.

**Table S8. Statistics of *I. hispidus* NPCB\_001 protein-coding gene annotation.**

| <b>Item</b>  | <b>Count</b> | <b>Percentage</b> |
|--------------|--------------|-------------------|
| Uniprot      | 5,760        | 46.81%            |
| Pfam         | 8,401        | 68.28%            |
| Refseq       | 4,295        | 34.91%            |
| Nr           | 10,580       | 85.99%            |
| Interproscan | 8,401        | 68.28%            |
| GO           | 5,719        | 46.48%            |
| KEGG         | 3,900        | 31.70%            |
| Pathway      | 2,375        | 19.30%            |
| COG          | 1,051        | 8.54%             |
| Annotation   | 10,814       | 87.89%            |
| All          | 12,304       | 100%              |

Annotation is the gene with at least one annotation; Uniprot is the gene annotated to the Uniprot database; Pfam is the gene that is annotated to the Pfam database; Refseq is the gene that is annotated to the Refseq database; Nr is the gene that is annotated to the Nr database; Interproscan is the gene that is annotated to the Interproscan GO is the gene annotated to the GO database; KEGG is the gene that is annotated to the KEGG database; Pathway is the gene that is annotated to the KEGG Pathway database; COG is the gene that is annotated to the COG database.

**Table S9. Candidate genes for mating type in *I. hispidus* NPCB\_001 genome.**

| Top Annotation                                             | Gene ID | Species                          | E -Value           | Accession Number |
|------------------------------------------------------------|---------|----------------------------------|--------------------|------------------|
| mitochondrial intermediate peptidase (MIP)                 | g1048   | <i>Schizosaccharomyces pombe</i> | 3e <sup>-52</sup>  | Q9Y7U6.1         |
| unknown conserved fungal protein-codon gene ( <i>βFG</i> ) | g9997   | <i>Fomitiporia mediterranea</i>  | 2e <sup>-70</sup>  | EJD03593.1       |
| homeodomain protein                                        | g1045   | <i>Kluyveromyces lactis</i>      | 1e <sup>-56</sup>  | P07921.1         |
|                                                            | g1047   | <i>Sanghuangporus baumii</i>     | 3e <sup>-103</sup> | OCB84704.1       |
| HD1 mating type protein                                    | g1046   | <i>Fomitiporia mediterranea</i>  | 9e <sup>-48</sup>  | EJD06593.1       |
| pheromone receptors ( <i>ste3</i> )                        | g3868   | <i>Schizophyllum commune</i>     | 6e <sup>-61</sup>  | P56502.2         |
|                                                            | g3904   | <i>Schizophyllum commune</i>     | 8e <sup>-53</sup>  | P56502.2         |
|                                                            | g4149   | <i>Schizophyllum commune</i>     | 2e <sup>-95</sup>  | P56502.2         |
| glycosyltransferase family 8 protein                       | g9996   | <i>Rattus norvegicus</i>         | 4e <sup>-41</sup>  | O08730.4         |

**Table S10. The source (URL) statistics for 47 representative Basidiomycetes used to phylogenetic analysis.**

| Species                          | Source                                                                                                                                                    |
|----------------------------------|-----------------------------------------------------------------------------------------------------------------------------------------------------------|
| <i>Malassezia sympodialis</i>    | <a href="https://www.ncbi.nlm.nih.gov/genome/?term=Malassezia%20sympodialis">https://www.ncbi.nlm.nih.gov/genome/?term=Malassezia%20sympodialis</a>       |
| <i>Tilletiaria anomala</i>       | <a href="https://www.ncbi.nlm.nih.gov/genome/?term=Tilletiaria%20anomala">https://www.ncbi.nlm.nih.gov/genome/?term=Tilletiaria%20anomala</a>             |
| <i>Ustilago maydis</i>           | <a href="https://www.ncbi.nlm.nih.gov/genome/?term=Ustilago%20maydis">https://www.ncbi.nlm.nih.gov/genome/?term=Ustilago%20maydis</a>                     |
| <i>Puccinia striiformis</i>      | <a href="https://www.ncbi.nlm.nih.gov/genome/?term=Puccinia%20striiformis">https://www.ncbi.nlm.nih.gov/genome/?term=Puccinia%20striiformis</a>           |
| <i>Rhodotorula toruloides</i>    | <a href="https://www.ncbi.nlm.nih.gov/genome/?term=Rhodotorula%20toruloides">https://www.ncbi.nlm.nih.gov/genome/?term=Rhodotorula%20toruloides</a>       |
| <i>Wallemia mellicola</i>        | <a href="https://www.ncbi.nlm.nih.gov/genome/?term=Wallemia%20mellicola">https://www.ncbi.nlm.nih.gov/genome/?term=Wallemia%20mellicola</a>               |
| <i>Filobasidium floriforme</i>   | <a href="https://www.ncbi.nlm.nih.gov/genome/?term=Filobasidium%20floriforme">https://www.ncbi.nlm.nih.gov/genome/?term=Filobasidium%20floriforme</a>     |
| <i>Cryptococcus depauperatus</i> | <a href="https://www.ncbi.nlm.nih.gov/genome/?term=Cryptococcus%20depauperatus">https://www.ncbi.nlm.nih.gov/genome/?term=Cryptococcus%20depauperatus</a> |
| <i>Trichosporon asahii</i>       | <a href="https://www.ncbi.nlm.nih.gov/genome/?term=Trichosporon%20asahii">https://www.ncbi.nlm.nih.gov/genome/?term=Trichosporon%20asahii</a>             |
| <i>Calocera cornea</i>           | <a href="https://www.ncbi.nlm.nih.gov/genome/?term=Calocera%20cornea">https://www.ncbi.nlm.nih.gov/genome/?term=Calocera%20cornea</a>                     |
| <i>Hydnum rufescens</i>          | <a href="https://www.ncbi.nlm.nih.gov/genome/?term=Hydnum%20rufescens">https://www.ncbi.nlm.nih.gov/genome/?term=Hydnum%20rufescens</a>                   |
| <i>Serendipita vermifera</i>     | <a href="https://www.ncbi.nlm.nih.gov/genome/?term=Serendipita%20vermifera">https://www.ncbi.nlm.nih.gov/genome/?term=Serendipita%20vermifera</a>         |
| <i>Auricularia subglabra</i>     | <a href="https://www.ncbi.nlm.nih.gov/genome/?term=Auricularia%20subglabra">https://www.ncbi.nlm.nih.gov/genome/?term=Auricularia%20subglabra</a>         |
| <i>Gloeophyllum trabeum</i>      | <a href="https://www.ncbi.nlm.nih.gov/genome/?term=Gloeophyllum%20trabeum">https://www.ncbi.nlm.nih.gov/genome/?term=Gloeophyllum%20trabeum</a>           |
| <i>Stereum hirsutum</i>          | <a href="https://www.ncbi.nlm.nih.gov/genome/?term=Stereum%20hirsutum">https://www.ncbi.nlm.nih.gov/genome/?term=Stereum%20hirsutum</a>                   |
| <i>Hericium alpestre</i>         | <a href="https://www.ncbi.nlm.nih.gov/genome/?term=Hericium%20alpestre">https://www.ncbi.nlm.nih.gov/genome/?term=Hericium%20alpestre</a>                 |
| <i>Cristinia sonorae</i>         | <a href="https://www.ncbi.nlm.nih.gov/genome/?term=Cristinia%20sonorae">https://www.ncbi.nlm.nih.gov/genome/?term=Cristinia%20sonorae</a>                 |
| <i>Ganoderma sinense</i>         | <a href="https://www.ncbi.nlm.nih.gov/genome/?term=Ganoderma%20sinense">https://www.ncbi.nlm.nih.gov/genome/?term=Ganoderma%20sinense</a>                 |
| <i>Gelatoporia subvermispora</i> | <a href="https://www.ncbi.nlm.nih.gov/genome/?term=Gelatoporia%20subvermispora">https://www.ncbi.nlm.nih.gov/genome/?term=Gelatoporia%20subvermispora</a> |
| <i>Wolfiporia cocos</i>          | <a href="https://www.ncbi.nlm.nih.gov/genome/?term=Wolfiporia%20cocos">https://www.ncbi.nlm.nih.gov/genome/?term=Wolfiporia%20cocos</a>                   |
| <i>Laetiporus sulphureus</i>     | <a href="https://www.ncbi.nlm.nih.gov/genome/?term=Laetiporus%20sulphureus">https://www.ncbi.nlm.nih.gov/genome/?term=Laetiporus%20sulphureus</a>         |
| <i>Suillus brevipes</i>          | <a href="https://www.ncbi.nlm.nih.gov/genome/?term=Suillus%20brevipes">https://www.ncbi.nlm.nih.gov/genome/?term=Suillus%20brevipes</a>                   |
| <i>Schizophyllum commune</i>     | <a href="https://www.ncbi.nlm.nih.gov/genome/?term=Schizophyllum%20commune">https://www.ncbi.nlm.nih.gov/genome/?term=Schizophyllum%20commune</a>         |
| <i>Pterula gracilis</i>          | <a href="https://www.ncbi.nlm.nih.gov/genome/?term=pterula%20gracilis">https://www.ncbi.nlm.nih.gov/genome/?term=pterula%20gracilis</a>                   |

---

|                                    |                                                                                                                                                                                         |
|------------------------------------|-----------------------------------------------------------------------------------------------------------------------------------------------------------------------------------------|
| <i>Pleurotus ostreatus</i>         | <a href="https://www.ncbi.nlm.nih.gov/genome/?term=Pleurotus%20ostreatus">https://www.ncbi.nlm.nih.gov/genome/?term=Pleurotus%20ostreatus</a>                                           |
| <i>Marasmius oreades</i>           | <a href="https://www.ncbi.nlm.nih.gov/genome/?term=Marasmius%20oreades">https://www.ncbi.nlm.nih.gov/genome/?term=Marasmius%20oreades</a>                                               |
| <i>Dendrothele bispora</i>         | <a href="https://www.ncbi.nlm.nih.gov/genome/?term=Dendrothele%20bispora">https://www.ncbi.nlm.nih.gov/genome/?term=Dendrothele%20bispora</a>                                           |
| <i>Lentinula edodes</i>            | <a href="https://www.ncbi.nlm.nih.gov/genome/?term=Lentinula%20edodes">https://www.ncbi.nlm.nih.gov/genome/?term=Lentinula%20edodes</a>                                                 |
| <i>Gymnopus androsaceus</i>        | <a href="https://www.ncbi.nlm.nih.gov/genome/?term=Gymnopus%20androsaceus">https://www.ncbi.nlm.nih.gov/genome/?term=Gymnopus%20androsaceus</a>                                         |
| <i>Amanita muscaria</i>            | <a href="https://www.ncbi.nlm.nih.gov/genome/?term=Amanita%20muscaria">https://www.ncbi.nlm.nih.gov/genome/?term=Amanita%20muscaria</a>                                                 |
| <i>Pluteus cervinus</i>            | <a href="https://www.ncbi.nlm.nih.gov/genome/?term=Pluteus%20cervinus">https://www.ncbi.nlm.nih.gov/genome/?term=Pluteus%20cervinus</a>                                                 |
| <i>Tricholoma matsutake</i>        | <a href="https://www.ncbi.nlm.nih.gov/genome/?term=Tricholoma%20matsutake">https://www.ncbi.nlm.nih.gov/genome/?term=Tricholoma%20matsutake</a>                                         |
| <i>Lyophyllum atratum</i>          | <a href="https://www.ncbi.nlm.nih.gov/genome/?term=Lyophyllum%20atratum">https://www.ncbi.nlm.nih.gov/genome/?term=Lyophyllum%20atratum</a>                                             |
| <i>Agaricus bisporus</i>           | <a href="https://www.ncbi.nlm.nih.gov/genome/?term=Agaricus%20bisporus">https://www.ncbi.nlm.nih.gov/genome/?term=Agaricus%20bisporus</a>                                               |
| <i>Psilocybe cubensis</i>          | <a href="https://www.ncbi.nlm.nih.gov/genome/?term=Psilocybe%20cubensis">https://www.ncbi.nlm.nih.gov/genome/?term=Psilocybe%20cubensis</a>                                             |
| <i>Cortinarius glaucopus</i>       | <a href="https://www.ncbi.nlm.nih.gov/genome/?term=Cortinarius%20glaucopus">https://www.ncbi.nlm.nih.gov/genome/?term=Cortinarius%20glaucopus</a>                                       |
| <i>Crassisporium funariophilum</i> | <a href="https://www.ncbi.nlm.nih.gov/genome/?term=Crassisporium%20funariophilum">https://www.ncbi.nlm.nih.gov/genome/?term=Crassisporium%20funariophilum</a>                           |
| <i>Rickenella mellea</i>           | <a href="https://www.ncbi.nlm.nih.gov/genome/?term=Rickenella%20mellea">https://www.ncbi.nlm.nih.gov/genome/?term=Rickenella%20mellea</a>                                               |
| <i>Schizopora paradoxa</i>         | <a href="https://www.ncbi.nlm.nih.gov/genome/?term=Schizopora%20paradoxa">https://www.ncbi.nlm.nih.gov/genome/?term=Schizopora%20paradoxa</a>                                           |
| <i>Phellinidium pouzari</i>        | <a href="https://www.ncbi.nlm.nih.gov/genome/?term=Phellinidium%20pouzarii">https://www.ncbi.nlm.nih.gov/genome/?term=Phellinidium%20pouzarii</a>                                       |
| <i>Phellopilus nigrolimitatus</i>  | <a href="https://www.ncbi.nlm.nih.gov/genome/?term=Phellopilus%20nigrolimitatus">https://www.ncbi.nlm.nih.gov/genome/?term=Phellopilus%20nigrolimitatus</a>                             |
| <i>Pyrrhoderma noxium</i>          | <a href="https://www.ncbi.nlm.nih.gov/genome/?term=Pyrrhoderma%20noxium">https://www.ncbi.nlm.nih.gov/genome/?term=Pyrrhoderma%20noxium</a>                                             |
| <i>Phellinus noxius</i>            | <a href="https://www.ncbi.nlm.nih.gov/genome/?term=Phellinus%20noxius">https://www.ncbi.nlm.nih.gov/genome/?term=Phellinus%20noxius</a>                                                 |
| <i>Porodaedalea chrysoloma</i>     | <a href="https://genome.jgi.doe.gov/portal/pages/dynamicOrganismDownload.jsf?organism=Porchr1">https://genome.jgi.doe.gov/portal/pages/dynamicOrganismDownload.jsf?organism=Porchr1</a> |
| <i>Sanghuangporus baumii</i>       | <a href="https://www.ncbi.nlm.nih.gov/genome/?term=Sanghuangporus%20baumii">https://www.ncbi.nlm.nih.gov/genome/?term=Sanghuangporus%20baumii</a>                                       |
| <i>Inonotus obliquus</i>           | <a href="https://www.ncbi.nlm.nih.gov/genome/?term=Inonotus%20obliquus">https://www.ncbi.nlm.nih.gov/genome/?term=Inonotus%20obliquus</a>                                               |
| <i>Inonotus hispidus</i>           | <a href="https://www.ncbi.nlm.nih.gov/genome/?term=Inonotus%20hispidus">https://www.ncbi.nlm.nih.gov/genome/?term=Inonotus%20hispidus</a>                                               |

---

**Table S11. The source (URL) statistics for white-rot fungi used to analysis CAZymes.**

| Species                                         | Source                                                                                                                                                                                  |
|-------------------------------------------------|-----------------------------------------------------------------------------------------------------------------------------------------------------------------------------------------|
| <i>Inonotus hispidus</i> NPCB_001               | the study                                                                                                                                                                               |
| <i>Armillaria ostoyae</i> C18/9                 | <a href="https://www.ncbi.nlm.nih.gov/genome/?term=Armillaria+ostoyae">https://www.ncbi.nlm.nih.gov/genome/?term=Armillaria+ostoyae</a>                                                 |
| <i>Auricularia subglabra</i> SS-5 V1.0          | <a href="https://www.ncbi.nlm.nih.gov/genome/?term=Auricularia+subglabra">https://www.ncbi.nlm.nih.gov/genome/?term=Auricularia+subglabra</a>                                           |
| <i>Cerioporus squamosus</i> CCBS 676            | <a href="https://www.ncbi.nlm.nih.gov/genome/?term=Cerioporus+squamosus">https://www.ncbi.nlm.nih.gov/genome/?term=Cerioporus+squamosus</a>                                             |
| <i>Ceriporiopsis subvermispora</i> B v1.0       | <a href="https://www.ncbi.nlm.nih.gov/genome/?term=Cerioporus%20squamosus">https://www.ncbi.nlm.nih.gov/genome/?term=Cerioporus%20squamosus</a>                                         |
| <i>Dichomitus squalens</i> LYAD-421 SS1         | <a href="https://www.ncbi.nlm.nih.gov/genome/?term=Dichomitus%20squalens">https://www.ncbi.nlm.nih.gov/genome/?term=Dichomitus%20squalens</a>                                           |
| <i>Fomes fomentarius</i> CIRM-BRFM 1821         | <a href="https://www.ncbi.nlm.nih.gov/genome/?term=Fomes+fomentarius">https://www.ncbi.nlm.nih.gov/genome/?term=Fomes+fomentarius</a>                                                   |
| <i>Ganoderma boninense</i> G3 v1.0              | <a href="https://genome.jgi.doe.gov/portal/pages/dynamicOrganismDownload.jsf?organism=Ganbon1">https://genome.jgi.doe.gov/portal/pages/dynamicOrganismDownload.jsf?organism=Ganbon1</a> |
| <i>Ganoderma leucocontextum</i> Dai12418 v1.0   | <a href="https://genome.jgi.doe.gov/portal/pages/dynamicOrganismDownload.jsf?organism=Ganleu1">https://genome.jgi.doe.gov/portal/pages/dynamicOrganismDownload.jsf?organism=Ganleu1</a> |
| <i>Ganoderma lucidum</i> G.260125-1 v1.0        | <a href="https://genome.jgi.doe.gov/portal/pages/dynamicOrganismDownload.jsf?organism=Ganluc1">https://genome.jgi.doe.gov/portal/pages/dynamicOrganismDownload.jsf?organism=Ganluc1</a> |
| <i>Ganoderma sinense</i> ZZ0214-1               | <a href="https://www.ncbi.nlm.nih.gov/genome/?term=Ganoderma%20sinense">https://www.ncbi.nlm.nih.gov/genome/?term=Ganoderma%20sinense</a>                                               |
| <i>Heterobasidion annosum</i> v2.0              | <a href="https://genome.jgi.doe.gov/portal/pages/dynamicOrganismDownload.jsf?organism=Hetan2">https://genome.jgi.doe.gov/portal/pages/dynamicOrganismDownload.jsf?organism=Hetan2</a>   |
| <i>Irpex lacteus</i> CCBAS Fr. 238 617/93 v1.0  | <a href="https://genome.jgi.doe.gov/portal/pages/dynamicOrganismDownload.jsf?organism=Irplac1">https://genome.jgi.doe.gov/portal/pages/dynamicOrganismDownload.jsf?organism=Irplac1</a> |
| <i>Irpex rosettiformis</i> CBS 384.51           | <a href="https://www.ncbi.nlm.nih.gov/genome/?term=Irpex+rosettiformis">https://www.ncbi.nlm.nih.gov/genome/?term=Irpex+rosettiformis</a>                                               |
| <i>Lentinula edodes</i> Le (Bin) 0899 ss11      | <a href="https://www.ncbi.nlm.nih.gov/genome/?term=Lentinula+edodes">https://www.ncbi.nlm.nih.gov/genome/?term=Lentinula+edodes</a>                                                     |
| <i>Mucidula mucida</i> CBS 558.79               | <a href="https://www.ncbi.nlm.nih.gov/genome/?term=Mucidula%20mucida">https://www.ncbi.nlm.nih.gov/genome/?term=Mucidula%20mucida</a>                                                   |
| <i>Panus rudis</i> PR-1116 ss-1                 | <a href="https://www.ncbi.nlm.nih.gov/genome/?term=Panus+rudis">https://www.ncbi.nlm.nih.gov/genome/?term=Panus+rudis</a>                                                               |
| <i>Penicillium chrysogenum</i> ASM71027v1       | <a href="https://www.ncbi.nlm.nih.gov/genome/?term=Penicillium+chrysogenum">https://www.ncbi.nlm.nih.gov/genome/?term=Penicillium+chrysogenum</a>                                       |
| <i>Penicillium decumbens</i> ASM207224v1        | <a href="https://www.ncbi.nlm.nih.gov/genome/?term=Penicillium+decumbens">https://www.ncbi.nlm.nih.gov/genome/?term=Penicillium+decumbens</a>                                           |
| <i>Penicillium subrubescens</i> ASM190812v1     | <a href="https://www.ncbi.nlm.nih.gov/genome/?term=Penicillium+subrubescens">https://www.ncbi.nlm.nih.gov/genome/?term=Penicillium+subrubescens</a>                                     |
| <i>Phanerochaete carnosae</i> HHB-10118-Sp v1.0 | <a href="https://genome.jgi.doe.gov/portal/pages/dynamicOrganismDownload.jsf?organism=Phaca1">https://genome.jgi.doe.gov/portal/pages/dynamicOrganismDownload.jsf?organism=Phaca1</a>   |
| <i>Phanerochaete chrysosporium</i> RP-78 v2.2   | <a href="https://genome.jgi.doe.gov/portal/pages/dynamicOrganismDownload.jsf?organism=Phchr2">https://genome.jgi.doe.gov/portal/pages/dynamicOrganismDownload.jsf?organism=Phchr2</a>   |
| <i>Phlebia brevispora</i> HHB-7030 SS6 v1.0     | <a href="https://genome.jgi.doe.gov/portal/pages/dynamicOrganismDownload.jsf?organism=Phlbr1">https://genome.jgi.doe.gov/portal/pages/dynamicOrganismDownload.jsf?organism=Phlbr1</a>   |
| <i>Phlebia centrifuga</i> FBCC195               | <a href="https://genome.jgi.doe.gov/portal/pages/dynamicOrganismDownload.jsf?organism=Phlcn1">https://genome.jgi.doe.gov/portal/pages/dynamicOrganismDownload.jsf?organism=Phlcn1</a>   |

---

|                                              |                                                                                                                                                                                             |
|----------------------------------------------|---------------------------------------------------------------------------------------------------------------------------------------------------------------------------------------------|
| <i>Pleurotus cornucopiae</i> ASM1967732v2    | <a href="https://www.ncbi.nlm.nih.gov/genome/?term=Pleurotus+cornucopiae">https://www.ncbi.nlm.nih.gov/genome/?term=Pleurotus+cornucopiae</a>                                               |
| <i>Pleurotus ostreatoroseus</i> ASM529804v1  | <a href="https://www.ncbi.nlm.nih.gov/genome/?term=Pleurotus%20ostreatoroseus">https://www.ncbi.nlm.nih.gov/genome/?term=Pleurotus%20ostreatoroseus</a>                                     |
| <i>Pleurotus ostreatus</i> PC9               | <a href="https://www.ncbi.nlm.nih.gov/genome/?term=Pleurotus+ostreatus">https://www.ncbi.nlm.nih.gov/genome/?term=Pleurotus+ostreatus</a>                                                   |
| <i>Polyporus arcularius</i> HHB13444         | <a href="https://www.ncbi.nlm.nih.gov/genome/?term=Polyporus+arcularius">https://www.ncbi.nlm.nih.gov/genome/?term=Polyporus+arcularius</a>                                                 |
| <i>Polyporus squamosus</i> CCBS 676 v1.0     | <a href="https://genome.jgi.doe.gov/portal/pages/dynamicOrganismDownload.jsf?organism=Polsqu1">https://genome.jgi.doe.gov/portal/pages/dynamicOrganismDownload.jsf?organism=Polsqu1</a>     |
| <i>Stereum hirsutum</i> FP-91666 SS1         | <a href="https://www.ncbi.nlm.nih.gov/genome/?term=Stereum+hirsutum">https://www.ncbi.nlm.nih.gov/genome/?term=Stereum+hirsutum</a>                                                         |
| <i>Trametes cingulata</i> BRFM 1805          | <a href="https://www.ncbi.nlm.nih.gov/genome/?term=Trametes+cingulata">https://www.ncbi.nlm.nih.gov/genome/?term=Trametes+cingulata</a>                                                     |
| <i>Trametes gibbosa</i> CIRM-BRFM 1770 v1.0  | <a href="https://genome.jgi.doe.gov/portal/pages/dynamicOrganismDownload.jsf?organism=Tragib1">https://genome.jgi.doe.gov/portal/pages/dynamicOrganismDownload.jsf?organism=Tragib1</a>     |
| <i>Trametes maxima</i> CIRM-BRFM 1813 v1.0   | <a href="https://genome.jgi.doe.gov/portal/pages/dynamicOrganismDownload.jsf?organism=Tramax1">https://genome.jgi.doe.gov/portal/pages/dynamicOrganismDownload.jsf?organism=Tramax1</a>     |
| <i>Trametes polyzona</i> CIRM-BRFM 1798 v1.0 | <a href="https://genome.jgi.doe.gov/portal/pages/dynamicOrganismDownload.jsf?organism=Trapol1">https://genome.jgi.doe.gov/portal/pages/dynamicOrganismDownload.jsf?organism=Trapol1</a>     |
| <i>Trametes versicolor</i> FP-101664 SS1     | <a href="https://www.ncbi.nlm.nih.gov/genome/?term=Trametes+versicolor">https://www.ncbi.nlm.nih.gov/genome/?term=Trametes+versicolor</a>                                                   |
| <i>Trichaptum abietinum</i> v1.0             | <a href="https://genome.jgi.doe.gov/portal/pages/dynamicOrganismDownload.jsf?organism=Triab1_1">https://genome.jgi.doe.gov/portal/pages/dynamicOrganismDownload.jsf?organism=Triab1_1</a>   |
| <i>Trichoderma asperellum</i> CBS 433.97     | <a href="https://www.ncbi.nlm.nih.gov/genome/?term=Trichoderma+asperellum">https://www.ncbi.nlm.nih.gov/genome/?term=Trichoderma+asperellum</a>                                             |
| <i>Trichoderma harzianum</i> CBS 226.95      | <a href="https://www.ncbi.nlm.nih.gov/genome/?term=Trichoderma+harzianum">https://www.ncbi.nlm.nih.gov/genome/?term=Trichoderma+harzianum</a>                                               |
| <i>Trichoderma reesei</i> QM6a v2.0          | <a href="https://genome.jgi.doe.gov/portal/pages/dynamicOrganismDownload.jsf?organism=Trire_Chr">https://genome.jgi.doe.gov/portal/pages/dynamicOrganismDownload.jsf?organism=Trire_Chr</a> |

---

**Table S12. The 31 candidate genes for polysaccharide biosynthesis screened in the database.**

| Gene ID   | Type   | Uniprot | Pfam | Refseq | Nr | Interproscan | COG | KEGG | Pathway | GO |
|-----------|--------|---------|------|--------|----|--------------|-----|------|---------|----|
| g10984.t1 | GK     | ✓       | ✓    | ✓      |    | ✓            | ✓   | ✓    | ✓       | ✓  |
| g1643.t1  | GK     | ✓       |      | ✓      | ✓  | ✓            | ✓   | ✓    | ✓       | ✓  |
| g9496.t1  | PGM    | ✓       | ✓    | ✓      | ✓  | ✓            | ✓   | ✓    | ✓       | ✓  |
| g1845.t1  | PGM    |         | ✓    | ✓      | ✓  | ✓            |     | ✓    | ✓       | ✓  |
| g6624.t1  | PGM    | ✓       | ✓    |        |    |              | ✓   |      |         | ✓  |
| g5619.t1  | PGM    |         |      |        |    |              | ✓   | ✓    |         |    |
| g11146.t1 | PGM    | ✓       |      |        |    |              | ✓   |      |         | ✓  |
| g7966.t1  | PGM    | ✓       | ✓    | ✓      | ✓  | ✓            |     | ✓    | ✓       | ✓  |
| g1992.t1  | PGM    |         |      | ✓      | ✓  | ✓            |     | ✓    | ✓       |    |
| g2104.t1  | GLS    | ✓       | ✓    |        | ✓  | ✓            |     | ✓    | ✓       | ✓  |
| g407.t1   | GLS    | ✓       | ✓    |        | ✓  | ✓            |     | ✓    | ✓       | ✓  |
| g6073.t1  | GSAP   |         | ✓    |        | ✓  | ✓            |     |      |         | ✓  |
| g9853.t1  | GSAP   |         | ✓    | ✓      | ✓  | ✓            |     |      |         | ✓  |
| g11429.t1 | GSAP   | ✓       | ✓    | ✓      | ✓  | ✓            |     |      |         | ✓  |
| g11374.t1 | GSAP   | ✓       | ✓    | ✓      | ✓  | ✓            |     |      |         | ✓  |
| g9723.t1  | GSAP   |         | ✓    | ✓      |    | ✓            |     |      |         | ✓  |
| g6104.t1  | PMI    | ✓       | ✓    | ✓      | ✓  | ✓            |     | ✓    | ✓       | ✓  |
| g958.t1   | PMI    | ✓       | ✓    | ✓      | ✓  | ✓            | ✓   | ✓    | ✓       | ✓  |
| g1749.t1  | PGI    | ✓       | ✓    | ✓      | ✓  | ✓            |     | ✓    | ✓       | ✓  |
| g2234.t1  | FBPase | ✓       | ✓    | ✓      | ✓  | ✓            |     | ✓    | ✓       | ✓  |
| g944.t1   | UGE    | ✓       | ✓    |        |    |              |     |      |         | ✓  |
| g10160.t1 | UGE    | ✓       | ✓    | ✓      | ✓  | ✓            | ✓   | ✓    | ✓       | ✓  |
| g10636.t1 | UXS    | ✓       |      |        |    |              | ✓   | ✓    | ✓       | ✓  |
| g6344.t1  | GMD    |         | ✓    |        |    |              |     | ✓    |         |    |
| g684.t1   | GMD    | ✓       | ✓    | ✓      |    | ✓            | ✓   | ✓    | ✓       | ✓  |
| g8023.t1  | GMD    |         | ✓    |        |    |              | ✓   |      |         | ✓  |
| g714.t1   | GMD    | ✓       | ✓    | ✓      | ✓  | ✓            |     | ✓    | ✓       | ✓  |
| g8855.t1  | GMD    |         | ✓    |        |    |              |     |      |         |    |
| g1379.t1  | GMD    |         | ✓    |        |    |              |     |      |         |    |
| g2664.t1  | GMD    |         | ✓    |        |    | ✓            | ✓   | ✓    |         |    |
| g6775.t1  | FPK    | ✓       | ✓    | ✓      | ✓  | ✓            |     | ✓    | ✓       | ✓  |



**Table S13. The candidate genes for polysaccharide biosynthesis in *I. hispidus* NPCB\_001 genome.**

| Top Annotation                                                          | Gene ID   | Species                           | E - Value          | Per.Ident | Accession Number |
|-------------------------------------------------------------------------|-----------|-----------------------------------|--------------------|-----------|------------------|
| Glucokinase (GK)                                                        | g10984.t1 | <i>Aspergillus niger</i>          | 4e <sup>-115</sup> | 41.98%    | Q92407.1         |
|                                                                         | g1643.t1  | <i>Gluconobacter oxydans</i>      | 3e <sup>-30</sup>  | 41.34%    | Q5FQ97.1         |
| Phosphoglucosylmutase/<br>Glucose phosphomutase<br>(PGM)                | g9496.t1  | <i>Xanthobacter autotrophicus</i> | 1e <sup>-11</sup>  | 26.68%    | A7IIG5.2         |
|                                                                         | g1845.t1  | <i>Pongo abelii</i>               | 7e <sup>-163</sup> | 43.99%    | Q5R979.1         |
|                                                                         | g6624.t1  | <i>Saccharomyces cerevisiae</i>   | 1e <sup>-11</sup>  | 28.76%    | P38773.1         |
|                                                                         | g5619.t1  | <i>Bacillus subtilis</i>          | 6e <sup>-5</sup>   | 25.45%    | O06995.1         |
|                                                                         | g11146.t1 | <i>Bacillus subtilis</i>          | 4e <sup>-5</sup>   | 23.32%    | O06995.1         |
|                                                                         | g7966.t1  | <i>Aspergillus fumigatus</i>      | 0                  | 60.39%    | Q4WY53.1         |
|                                                                         | g1992.t1  | <i>Haloferax volcanii</i>         | 3e <sup>-4</sup>   | 25.19%    | D4GYH1.1         |
| 1,3-beta-glucan synthase<br>(GLS)                                       | g2104.t1  | <i>Cryptococcus neoformans</i>    | 0                  | 71.83%    | O93927.3         |
|                                                                         | g407.t1   | <i>Cryptococcus neoformans</i>    | 0                  | 73.71%    | O93927.3         |
| Beta-glucan synthesis-<br>associated protein<br>(GSAP)                  | g6073.t1  | <i>Saccharomyces cerevisiae</i>   | 3e <sup>-116</sup> | 45.37%    | P32486.2         |
|                                                                         | g9853.t1  | <i>Candida albicans</i>           | 1e <sup>-112</sup> | 39.93%    | P87024.1         |
|                                                                         | g11429.t1 | <i>Saccharomyces cerevisiae</i>   | 1e <sup>-117</sup> | 45.85%    | P33336.1         |
|                                                                         | g11374.t1 | <i>Saccharomyces cerevisiae</i>   | 7e <sup>-109</sup> | 44.95%    | P33336.1         |
|                                                                         | g9723.t1  | <i>Trichophyton benhamiae</i>     | 5e <sup>-52</sup>  | 38.41%    | D4AJR9.1         |
| Phosphomannose<br>isomerase/Mannose-6-<br>phosphate isomerase<br>(PMI)  | g6104.t1  | <i>Candida albicans</i>           | 8e <sup>-86</sup>  | 35.19%    | P34948.2         |
|                                                                         | g958.t1   | <i>Cryptococcus neoformans</i>    | 2e <sup>-117</sup> | 45.47%    | Q9HFU4.2         |
| Glucose-6-phosphate<br>isomerase /<br>Phosphoglucose<br>isomerase (PGI) | g1749.t1  | <i>Agaricus bisporus</i>          | 0                  | 77.49%    | Q711G1.1         |
| Fructose-1,6-<br>biphosphatase<br>(FBPase)                              | g2234.t1  | <i>Spinacia oleracea</i>          | 7e <sup>-135</sup> | 61.33%    | P14766.2         |
| UDP-glucose 4-<br>epimerase (UGE)                                       | g944.t1   | <i>Oryza sativa</i>               | 3e <sup>-8</sup>   | 28.92%    | Q6K2E1.1         |
|                                                                         | g10160.t1 | <i>Dictyostelium discoideum</i>   | 2e <sup>-85</sup>  | 45.01%    | Q553X7.1         |

|                                              |           |                                       |                    |        |          |
|----------------------------------------------|-----------|---------------------------------------|--------------------|--------|----------|
| UDP-glucuronic acid<br>decarboxylase 1 (UXS) | g10636.t1 | <i>Mus musculus</i>                   | 5e <sup>-154</sup> | 57.42% | Q91XL3.1 |
| GDP-mannose 4,6<br>dehydratase (GMD)         | g6344.t1  | <i>Azospirillum<br/>brasilense</i>    | 1e <sup>-11</sup>  | 26.27% | Q59083.1 |
|                                              | g684.t1   | <i>Mus musculus</i>                   | 3e <sup>-124</sup> | 55.36% | P23591.3 |
|                                              | g8023.t1  | <i>Mycoplasma<br/>genitalium</i>      | 0.012              | 27.66% | P47364.1 |
|                                              | g714.t1   | <i>Cricetulus griseus</i>             | 1e <sup>-178</sup> | 69.36% | Q8K3X3.1 |
|                                              | g8855.t1  | <i>Rickettsia bellii</i>              | 0.035              | 30.38% | Q1RIM4.1 |
|                                              | g1379.t1  | <i>Rickettsia bellii</i>              | 0.007              | 30.77% | Q1RIM4.1 |
|                                              | g2664.t1  | <i>Mycobacterium<br/>tuberculosis</i> | 3e <sup>-12</sup>  | 36.04% | P9WH08.1 |
| Phosphofructokinase<br>(FPK)                 | g6775.t1  | <i>Schizosaccharomy<br/>ces pombe</i> | 0                  | 53.87% | O42938.1 |

**Table S14. Terpenoid biosynthesis related enzymes in *I. hispidus* NPCB\_001.**

| gene ID | protein ID | Top Annotation |                    |                            |                  | Type                   |
|---------|------------|----------------|--------------------|----------------------------|------------------|------------------------|
|         |            | Identities     | E -Value           | Species                    | Accession Number |                        |
| g7579   | g7579.t1   | 65.88%         | 0                  | <i>Ganoderma lucidum</i>   | D7NJ68.1         | oxidosqualene cyclase  |
| g8354   | g8354.t1   | 60.94%         | 0                  | <i>Ganoderma lucidum</i>   | A0SJQ5.1         | squalene synthase      |
| g7183   | g7183.t1   | 57.41%         | 3e <sup>-136</sup> | <i>Cyclocybe aegerita</i>  | A0A5Q0QRJ3.1     | sesquiterpene synthase |
| g8436   | g8436.t1   | 53.45%         | 1e <sup>-145</sup> | <i>Postia placenta</i>     | A0A348B788.1     |                        |
| g8982   | g8982.t1   | 32.51%         | 1e <sup>-52</sup>  | <i>Postia placenta</i>     | B8PD44.1         |                        |
| g8985   | g8985.t1   | 35.08%         | 7e <sup>-59</sup>  | <i>Postia placenta</i>     | B8PD44.1         |                        |
| g8990   | g8990.t1   | 27.16%         | 7e <sup>-30</sup>  | <i>Postia placenta</i>     | B8PD44.1         |                        |
| g8991   | g8991.t1   | 31.91%         | 1e <sup>-51</sup>  | <i>Postia placenta</i>     | B8PD44.1         |                        |
| g8992   | g8992.t1   | 28.47%         | 5e <sup>-31</sup>  | <i>Postia placenta</i>     | B8PD44.1         |                        |
| g9225   | g9225.t1   | 30.82%         | 3e <sup>-47</sup>  | <i>Postia placenta</i>     | B8PD44.1         |                        |
| g9226   | g9226.t1   | 28.99%         | 1e <sup>-38</sup>  | <i>Postia placenta</i>     | B8PD44.1         |                        |
| g9227   | g9227.t1   | 31.99%         | 8e <sup>-42</sup>  | <i>Postia placenta</i>     | B8PD44.1         |                        |
| g1390   | g1390.t1   | 66.08%         | 6e <sup>-172</sup> | <i>Coprinopsis cinerea</i> | A8NE23.1         | phytoene synthase      |
| g6332   | g6332.t1   | 59.65%         | 8e <sup>-155</sup> | <i>Postia placenta</i>     | A0A348B788.1     |                        |
| g2983   | g2983.t1   | 57.41%         | 3e <sup>-136</sup> | <i>Cyclocybe aegerita</i>  | A0A5Q0QRJ3.1     |                        |
| g1139   | g1139.t1   | 45.71%         | 2e <sup>-100</sup> | <i>Postia placenta</i>     | B8PD44.1         |                        |
| g8866   | g8866.t1   | 66.08%         | 6e <sup>-172</sup> | <i>Coprinopsis cinerea</i> | A8NE23.1         |                        |
| g6286   | g6286.t1   | 37.13%         | 5e <sup>-56</sup>  | <i>Rattus norvegicus</i>   | D3ZN43.1         |                        |

**Table S15. Identify matrix of Eight STSs from *I. hispidus* NPCB\_001.**

|          | g9226.tl | g8991.tl | g9227.tl | g8985.tl | g8982.tl | g8992.tl | g9225.tl | g8990.tl |
|----------|----------|----------|----------|----------|----------|----------|----------|----------|
| g9226.tl | 100      | 69.83    | 43.3     | 46.44    | 49.49    | 42.69    | 43.05    | 42.97    |
| g8991.tl | 69.83    | 100      | 46.37    | 49.7     | 50.6     | 44.56    | 45.54    | 45.07    |
| g9227.tl | 43.3     | 46.37    | 100      | 90.91    | 51.42    | 41.58    | 43.85    | 43.16    |
| g8985.tl | 46.44    | 49.7     | 90.91    | 100      | 55.12    | 43.45    | 45.78    | 44.67    |
| g8982.tl | 49.49    | 50.6     | 51.42    | 55.12    | 100      | 54.42    | 55.36    | 53.62    |
| g8992.tl | 42.69    | 44.56    | 41.58    | 43.45    | 54.42    | 100      | 91.19    | 93.16    |
| g9225.tl | 43.05    | 45.54    | 43.85    | 45.78    | 55.36    | 91.19    | 100      | 90.82    |
| g8990.tl | 42.97    | 45.07    | 43.16    | 44.67    | 53.62    | 93.16    | 90.82    | 100      |

The percent identity matrix was analyzed online by Clustal Omega (<https://www.ebi.ac.uk/Tools/msa/clustalo/>).

**Table S16. NRPS-like biosynthesis related enzymes in *I. hispidus* NPCB\_001 genome.**

| gene ID | protein ID | Top Annotation |            |                    |                                  |                  | Type                         |
|---------|------------|----------------|------------|--------------------|----------------------------------|------------------|------------------------------|
|         |            | homology       | Identities | E -Value           | Species                          | Accession Number |                              |
| g7927   | g7927.t1   | Nps10          | 28.07%     | 3e <sup>-88</sup>  | <i>Heterobasidion annosum</i>    | A0A1B1ZGB5.1     | NRPS-like                    |
| g8202   | g8202.t1   | Nps10          | 38.35%     | 0                  | <i>Heterobasidion annosum</i>    | A0A1B1ZGB5.1     | NRPS-like                    |
| g8310   | g8310.t1   | HispS          | 26.50%     | 1e <sup>-100</sup> | <i>Neonothopanus nambi</i>       | A0A3G9K3K9.1     | PKS-NRPS hybrid              |
| g8482   | g8482.t1   | greA           | 35.64%     | 7e <sup>-177</sup> | <i>Suillus grevillei</i>         | I6NXV7.1         | NRPS-like                    |
| g1509   | g1509.t1   | Lys1           | 48.94%     | 0                  | <i>Schizosaccharomyces pombe</i> | P40976.3         | L-2-aminoacidipate reductase |

**Table S17. The 46 identified NRPS-likes from fungi used in cluster analysis.**

| Entry      | Genbank Accession No | Fungal species                                 |
|------------|----------------------|------------------------------------------------|
| ATEG_03630 | Q0CRQ4               | <i>Aspergillus terreus</i>                     |
| StbB       | A0A193PS46           | <i>Stachybotrys bisbyi</i>                     |
| CicB       | A0A1U8QW91           | <i>Emericella nidulans</i>                     |
| Nps11      | F8P9P5               | <i>Serpula lacrymans</i> var. <i>lacrymans</i> |
| Nps9       | F8P2C8               | <i>Serpula lacrymans</i> var. <i>lacrymans</i> |
| NCU05000   | Q7RW48               | <i>Neurospora crassa</i>                       |
| Nps10      | A0A1B1ZGB5           | <i>Heterobasidion annosum</i>                  |
| ATRR       | A0A1U8QWA2           | <i>Emericella nidulans</i>                     |
| Nps3       | F8P1W3               | <i>Serpula lacrymans</i> var. <i>lacrymans</i> |
| InvA2      | A0A0S1RUN4           | <i>Paxillus involutus</i>                      |
| InvA1      | A0A0S2E7Z1           | <i>Paxillus involutus</i>                      |
| InvA5      | A0A0S2E7W7           | <i>Paxillus involutus</i>                      |
| GreA       | I6NXV7               | <i>Suillus grevillei</i>                       |
| CC1G_06235 | A8NVB7               | <i>Coprinopsis cinerea</i>                     |
| CC1G_03009 | A8NS27               | <i>Coprinopsis cinerea</i>                     |
| InvA3      | A0A0S2E7V8           | <i>Paxillus involutus</i>                      |
| ATEG_03629 | Q0CRQ5               | <i>Aspergillus terreus</i>                     |
| InvA4      | A0A0S2E7X0           | <i>Paxillus involutus</i>                      |
| InvA6      | A0A0S2E7W3           | <i>Paxillus involutus</i>                      |
| ATEG_03631 | Q0CRQ3               | <i>Aspergillus terreus</i>                     |
| ATEG_07661 | Q0CF73               | <i>Aspergillus terreus</i>                     |
| MeIA       | Q0CRX1               | <i>Aspergillus terreus</i>                     |
| ATEG_07662 | Q0CF72               | <i>Aspergillus terreus</i>                     |
| LnaA       | B8NTZ9               | <i>Aspergillus flavus</i>                      |
| ATEG_07659 | Q0CF75               | <i>Aspergillus terreus</i>                     |
| ApvA       | Q0CWD0               | <i>Aspergillus terreus</i>                     |
| MicA       | Q5B7T4               | <i>Emericella nidulans</i>                     |
| LnbA       | B8NWW5               | <i>Aspergillus flavus</i>                      |
| StbA       | A0A193PS74           | <i>Stachybotrys bisbyi</i>                     |
| LnaD       | B8NU02               | <i>Aspergillus flavus</i>                      |
| ATEG_03635 | Q0CRP9               | <i>Aspergillus terreus</i>                     |
| LnaC       | B8NU01               | <i>Aspergillus flavus</i>                      |
| ATEG_07660 | Q0CF74               | <i>Aspergillus terreus</i>                     |
| LnbC       | B8NWW3               | <i>Aspergillus flavus</i>                      |
| BtyA       | Q0CU19               | <i>Aspergillus terreus</i>                     |
| StbC       | A0A193PS58           | <i>Stachybotrys bisbyi</i>                     |
| PngA       | Q0CBN5               | <i>Aspergillus terreus</i>                     |
| AtrA       | Q0CT94               | <i>Aspergillus terreus</i>                     |
| ATEG_07663 | Q0CF71               | <i>Aspergillus terreus</i>                     |
| LnaF1      | B8NU03               | <i>Aspergillus flavus</i>                      |
| LnaB1      | B8NU00               | <i>Aspergillus flavus</i>                      |
| ATEG_03636 | Q0CRP8               | <i>Aspergillus terreus</i>                     |
| LnaE       | B8NTZ8               | <i>Aspergillus flavus</i>                      |
| LnaB2      | B8NWW2               | <i>Aspergillus flavus</i>                      |
| LnaF2      | B8NWW7               | <i>Aspergillus flavus</i>                      |
| LnbE       | B8NWW6               | <i>Aspergillus flavus</i>                      |

**Table S18. Sequence homology analysis for two PKSs from *I. hispidus* NPCB\_001.**

| gene ID | protein ID | Top Annotation |            |                   |                                |                  |
|---------|------------|----------------|------------|-------------------|--------------------------------|------------------|
|         |            | homologous     | Identities | E -Value          | Species                        | Accession Number |
| g1510   | g1510.t1   | PikA2          | 33.60%     | 1e <sup>-62</sup> | <i>Streptomyces venezuelae</i> | Q9ZGI4.1         |
| g6596   | g6596.t1   | ArmB           | 40.24%     | 0                 | <i>Armillaria ostoyae</i>      | A0A284RE13.1     |

**Table S19. The 22 identified PKS from Basidiomycetes used in cluster analysis.**

| Uniport Entry | Gene Names               | Protein | Annotations                                | Organism                                       |
|---------------|--------------------------|---------|--------------------------------------------|------------------------------------------------|
| A0A0D1DNX1    | fas2, UMAG_06460         | Fas2    | Fatty acid synthase 2                      | <i>Ustilago maydis</i>                         |
| O43103        | SID2, UMAG_10189         | Sid2    | Ferrichrome siderophore peptide synthetase | <i>Ustilago maydis</i>                         |
| Q4PEM9        | fer3, UMAG_01434         | Fer3    | Siderophore peptide synthetase fer3        | <i>Ustilago maydis</i>                         |
| B7STY1        | atrA                     | AtrA    | Atromentin synthetase                      | <i>Tapinella panuoides</i>                     |
| I6NXV7        | greA                     | GreA    | Atromentin synthetase greA                 | <i>Suillus grevillei</i>                       |
| A0A384XH94    | stpks1                   | StPKS1  | Highly reducing polyketide synthase stpks1 | <i>Strobilurus tenacellus</i>                  |
| F8P1W3        | nps3, SERLADRAFT_416588  | Nps3    | Atromentin synthetase nps3                 | <i>Serpula lacrymans</i> var. <i>lacrymans</i> |
| F8P9P5        | nps11, SERLADRAFT_453044 | Nps11   | Adenylate-forming reductase Nps11          | <i>Serpula lacrymans</i> var. <i>lacrymans</i> |
| A0A0S1RUN4    | invA2                    | InvA2   | i                                          | <i>Paxillus involutus</i>                      |
| A0A0S2E7V8    | invA3                    | InvA3   | Inactive atromentin synthetase invA3       | <i>Paxillus involutus</i>                      |
| A0A0S2E7W3    | invA6                    | InvA6   | Inactive atromentin synthetase invA6       | <i>Paxillus involutus</i>                      |
| A0A0S2E7W7    | invA5                    | InvA5   | Atromentin synthetase invA5                | <i>Paxillus involutus</i>                      |
| A0A0S2E7X0    | invA4                    | InvA4   | Inactive atromentin synthetase invA4       | <i>Paxillus involutus</i>                      |
| A0A0S2E7Z1    | invA1                    | InvA1   | Atromentin synthetase invA1                | <i>Paxillus involutus</i>                      |
| Q52US9        | fso1                     | Fso1    | Nonribosomal peptide synthase fso1         | <i>Omphalotus olearius</i>                     |
| A0A3G9K3K9    | hisps                    | HispS   | Hispidin synthase                          | <i>Neonothopanus namibi</i>                    |
| A0A1B1ZGB5    | nps10                    | Nps10   | Adenylate-forming reductase Nps10          | <i>Heterobasidion annosum</i>                  |
| A8NF97        | cpf1, CC1G_04210         | Cpf1    | Coprinoferin synthetase                    | <i>Coprinopsis cinerea</i>                     |
| A0A248AFK6    | NPS2, CERSUDRAFT_172109  | NPS2    | Nonribosomal peptide synthase NPS2         | <i>Ceriporiopsis subvermispora</i>             |
| A0A284RE13    | armB, ARMOST_10343       | AO_ArmB | Orsellinic acid synthase ArmB              | <i>Armillaria ostoyae</i>                      |
| I3ZNU9        | armB                     | AM_ArmB | Orsellinic acid synthase armB              | <i>Armillaria mellea</i>                       |
| A0A2H3CTK0    | armB, ARMGADRAFT_1169973 | AG_ArmB | Orsellinic acid synthase armB              | <i>Armillaria gallica</i>                      |



**Table S20. Identification of cytochrome P450 genes in *I. hispidus* NPCB\_001 genome.**

| Protein ID | Gene ID | aa length | Identify | E-Value            | Species                         | Accession   |
|------------|---------|-----------|----------|--------------------|---------------------------------|-------------|
| g7737.t1   | g7737   | 555       | 42.63%   | 8e <sup>-119</sup> | <i>Postia placenta</i>          | F1SYD1.1    |
| g7738.t1   | g7738   | 285       | 37.34%   | 6e <sup>-51</sup>  | <i>Postia placenta</i>          | F1SY95.1    |
| g7739.t1   | g7739   | 215       | 56.59%   | 7e <sup>-81</sup>  | <i>Postia placenta</i>          | F1SYD1.1    |
| g7740.t1   | g7740   | 577       | 41.84%   | 2e <sup>-136</sup> | <i>Postia placenta</i>          | F1SYD1.1    |
| g7892.t1   | g7892   | 551       | 32.11%   | 3e <sup>-72</sup>  | <i>Postia placenta</i>          | F1SYB2.1    |
| g5143.t1   | g5143   | 547       | 33.33%   | 9e <sup>-53</sup>  | <i>Postia placenta</i>          | F1SYB2.1    |
| g5144.t1   | g5144   | 546       | 32.10%   | 5e <sup>-55</sup>  | <i>Postia placenta</i>          | F1SYB2.1    |
| g6498.t1   | g6498   | 511       | 25.15%   | 1e <sup>-40</sup>  | <i>Postia placenta</i>          | F1SYB2.1    |
| g9922.t1   | g9922   | 540       | 49.79%   | 3e <sup>-142</sup> | <i>Postia placenta</i>          | F1SYB2.1    |
| g2535.t1   | g2535   | 523       | 54.74%   | 0                  | <i>Postia placenta</i>          | F1SYB2.1    |
| g2443.t1   | g2443   | 556       | 27.55%   | 4e <sup>-50</sup>  | <i>Postia placenta</i>          | F1SYB2.1    |
| g328.t1    | g328    | 576       | 29.10%   | 1e <sup>-53</sup>  | <i>Postia placenta</i>          | F1SYB2.1    |
| g8153.t1   | g8153   | 496       | 27.84%   | 1e <sup>-56</sup>  | <i>Postia placenta</i>          | F1SYH0.1    |
| g11557.t1  | g11557  | 538       | 34.58%   | 4e <sup>-87</sup>  | <i>Postia placenta</i>          | F1SYE5.1    |
| g11568.t1  | g11568  | 531       | 32.97%   | 1e <sup>-92</sup>  | <i>Postia placenta</i>          | F1SYE5.1    |
| g9242.t1   | g9242   | 376       | 32.25%   | 1e <sup>-37</sup>  | <i>Postia placenta</i>          | F1SYE5.1    |
| g5325.t1   | g5325   | 560       | 36.45%   | 6e <sup>-99</sup>  | <i>Postia placenta</i>          | F1SYH0.1    |
| g9243.t1   | g9243   | 184       | 43.26%   | 4e <sup>-44</sup>  | <i>Postia placenta</i>          | F1SYH7.1    |
| g5945.t1   | g5945   | 616       | 37.34%   | 2e <sup>-105</sup> | <i>Postia placenta</i>          | F1SYH7.1    |
| g808.t1    | g808    | 548       | 52.38%   | 0                  | <i>Postia placenta</i>          | F1SYE5.1    |
| g1614.t1   | g1614   | 547       | 49.13%   | 3e <sup>-176</sup> | <i>Postia placenta</i>          | F1SY85.1    |
| g5827.t1   | g5827   | 547       | 44.42%   | 1e <sup>-166</sup> | <i>Postia placenta</i>          | F1SY85.1    |
| g5903.t1   | g5903   | 473       | 48.42%   | 4e <sup>-163</sup> | <i>Postia placenta</i>          | F1SY85.1    |
| g5813.t1   | g5813   | 444       | 49.41%   | 5e <sup>-150</sup> | <i>Postia placenta</i>          | F1SY85.1    |
| g5828.t1   |         | 545       | 46.68%   | 3e <sup>-178</sup> | <i>Postia placenta</i>          | F1SY85.1    |
| g5828.t3   | g5828   | 526       | 43.36%   | 5e <sup>-155</sup> | <i>Postia placenta</i>          | F1SY85.1    |
| g5828.t2   |         | 496       | 47.74%   | 3e <sup>-166</sup> | <i>Postia placenta</i>          | F1SY85.1    |
| g6234.t1   | g6234   | 606       | 47.16%   | 5e <sup>-156</sup> | <i>Postia placenta</i>          | F1SY85.1    |
| g5881.t1   | g5881   | 543       | 48.28%   | 7e <sup>-172</sup> | <i>Postia placenta</i>          | F1SYH4.1    |
| g5882.t1   | g5882   | 553       | 47.07%   | 3e <sup>-172</sup> | <i>Postia placenta</i>          | F1SYI1.1    |
| g5885.t1   | g5885   | 543       | 47.78%   | 8e <sup>-179</sup> | <i>Postia placenta</i>          | F1SYH4.1    |
| g3909.t1   | g3909   | 411       | 40.71%   | 8e <sup>-98</sup>  | <i>Postia placenta</i>          | F1SY85.1    |
| g2430.t1   | g2430   | 613       | 36.52%   | 2e <sup>-115</sup> | <i>Postia placenta</i>          | F1SYH4.1    |
| g3331.t1   | g3331   | 546       | 34.05%   | 4e <sup>-68</sup>  | <i>Postia placenta</i>          | F1SYB6.1    |
| g8227.t1   | g8227   | 510       | 28.30%   | 4e <sup>-41</sup>  | <i>Mus musculus</i>             | Q9WVK8.1    |
| g10492.t1  | g10492  | 591       | 31.03%   | 3e <sup>-69</sup>  | <i>Penicillium brefeldianum</i> | A0A068A78.1 |
| g1801.t1   | g1801   | 574       | 30.14%   | 1e <sup>-56</sup>  | <i>Penicillium brefeldianum</i> | A0A068A78.1 |

|           |        |      |        |                    |                                   |              |
|-----------|--------|------|--------|--------------------|-----------------------------------|--------------|
| g10583.t1 | g10583 | 585  | 30.61% | 4e <sup>-67</sup>  | <i>Uromyces viciae-fabae</i>      | O00061.1     |
| g1482.t1  | g1482  | 576  | 33.66% | 2e <sup>-64</sup>  | <i>Uromyces viciae-fabae</i>      | O00061.1     |
| g1791.t1  | g1791  | 574  | 32.74% | 7e <sup>-70</sup>  | <i>Uromyces viciae-fabae</i>      | O00061.1     |
| g1802.t1  | g1802  | 648  | 31.83% | 2e <sup>-59</sup>  | <i>Fusarium pseudograminearum</i> | P0DPA4.1     |
| g8590.t1  | g8590  | 598  | 32.72% | 1e <sup>-74</sup>  | <i>Fusarium pseudograminearum</i> | P0DPA4.1     |
| g8598.t1  | g8598  | 564  | 31.91% | 1e <sup>-74</sup>  | <i>Fusarium pseudograminearum</i> | P0DPA4.1     |
| g2592.t1  | g2592  | 543  | 45.09% | 3e <sup>-162</sup> | <i>Postia placenta</i>            | F1SY83.1     |
| g2721.t1  | g2721  | 516  | 45.16% | 1e <sup>-144</sup> | <i>Postia placenta</i>            | F1SY49.1     |
| g344.t1   | g344   | 576  | 25.05% | 2e <sup>-30</sup>  | <i>Fusarium graminearum</i>       | I1RV19.1     |
| g8167.t1  | g8167  | 412  | 27.86% | 5e <sup>-45</sup>  | <i>Ustilago maydis</i>            | E9RHHV4.1    |
| g10139.t1 | g10139 | 581  | 48.86% | 8e <sup>-167</sup> | <i>Postia placenta</i>            | F1SY74.1     |
| g10141.t1 | g10141 | 551  | 48.25% | 0                  | <i>Postia placenta</i>            | F1SY74.1     |
| g10142.t1 | g10142 | 613  | 50.98% | 0                  | <i>Postia placenta</i>            | F1SY74.1     |
| g4881.t1  | g4881  | 885  | 39.77% | 2e <sup>-139</sup> | <i>Postia placenta</i>            | F1SY74.1     |
| g10551.t1 | g10551 | 581  | 53.05% | 0                  | <i>Ustilago maydis</i>            | P49602.1     |
| g894.t1   | g894   | 553  | 58.85% | 0                  | <i>Ustilago maydis</i>            | P49602.1     |
| g11566.t1 | g11566 | 493  | 29.31% | 4e <sup>-44</sup>  | <i>Aspergillus violaceofuscus</i> | A0A2V5GZ95.1 |
| g11567.t1 | g11567 | 1049 | 34.20% | 2e <sup>-65</sup>  | <i>Schizosaccharomyces pombe</i>  | Q9P6J0.1     |
| g11567.t2 |        | 1053 | 33.04% | 3e <sup>-66</sup>  | <i>Schizosaccharomyces pombe</i>  | Q9US44.1     |
| g8046.t1  | g8046  | 484  | 60.51% | 0                  | <i>Postia placenta</i>            | F1SY73.1     |
| g8198.t1  | g8198  | 345  | 62.82% | 6e <sup>-155</sup> | <i>Postia placenta</i>            | F1SY73.1     |
| g8196.t1  | g8196  | 524  | 55.65% | 0                  | <i>Postia placenta</i>            | F1SY73.1     |
| g8134.t1  | g8134  | 448  | 36.71% | 9e <sup>-106</sup> | <i>Postia placenta</i>            | F1SY68.1     |
| g612.t1   | g612   | 520  | 39.23% | 4e <sup>-108</sup> | <i>Postia placenta</i>            | F1SYH1.1     |
| g650.t1   | g650   | 262  | 41.92% | 6e <sup>-67</sup>  | <i>Postia placenta</i>            | F1SY68.1     |
| g637.t1   | g637   | 513  | 41.39% | 2e <sup>-123</sup> | <i>Postia placenta</i>            | F1SYH1.1     |
| g638.t1   | g638   | 513  | 40.78% | 3e <sup>-123</sup> | <i>Postia placenta</i>            | F1SYH1.1     |
| g651.t1   | g651   | 639  | 36.74% | 1e <sup>-100</sup> | <i>Postia placenta</i>            | F1SYH1.1     |
| g651.t2   |        | 275  | 36.36% | 4e <sup>-38</sup>  | <i>Psilocybe cubensis</i>         | P0DPA7.1     |
| g655.t1   | g655   | 116  | 47.69% | 6e <sup>-16</sup>  | <i>Postia placenta</i>            | F1SYH1.1     |
| g657.t1   | g657   | 649  | 39.62% | 2e <sup>-102</sup> | <i>Armillaria gallica</i>         | A0A2H3CNY6.1 |
| g658.t1   | g658   | 525  | 37.74% | 4e <sup>-104</sup> | <i>Postia placenta</i>            | F1SYH1.1     |
| g633.t1   | g633   | 512  | 42.04% | 1e <sup>-118</sup> | <i>Postia placenta</i>            | F1SYH1.1     |

|          |       |     |        |                    |                            |                  |
|----------|-------|-----|--------|--------------------|----------------------------|------------------|
| g649.t1  | g649  | 512 | 41.97% | 9e <sup>-118</sup> | <i>Postia placenta</i>     | F1SYH1.1         |
| g652.t1  | g652  | 512 | 40.08% | 3e <sup>-117</sup> | <i>Postia placenta</i>     | F1SYH1.1         |
| g639.t1  | g639  | 512 | 42.67% | 7e <sup>-123</sup> | <i>Postia placenta</i>     | F1SYH1.1         |
| g656.t1  | g656  | 162 | 47.33% | 2e <sup>-35</sup>  | <i>Armillaria gallica</i>  | A0A2H3C<br>NY6.1 |
| g635.t1  | g635  | 499 | 39.61% | 8e <sup>-113</sup> | <i>Postia placenta</i>     | F1SYH1.1         |
| g630.t1  | g630  | 509 | 40.13% | 1e <sup>-119</sup> | <i>Postia placenta</i>     | F1SYH1.1         |
| g632.t1  | g632  | 513 | 40.13% | 6e <sup>-119</sup> | <i>Postia placenta</i>     | F1SYH1.1         |
| g653.t1  | g653  | 384 | 36.29% | 2e <sup>-85</sup>  | <i>Postia placenta</i>     | F1SY68.1         |
| g653.t2  |       | 369 | 36.34% | 2e <sup>-77</sup>  | <i>Postia placenta</i>     | F1SYH1.1         |
| g654.t1  | g654  | 113 | 43.55% | 9e <sup>-13</sup>  | <i>Postia placenta</i>     | F1SYH1.1         |
| g631.t1  | g631  | 513 | 40.72% | 1e <sup>-118</sup> | <i>Postia placenta</i>     | F1SYH1.1         |
| g626.t1  | g626  | 205 | 43.28% | 6e <sup>-45</sup>  | <i>Postia placenta</i>     | F1SYH1.1         |
| g627.t1  | g627  | 512 | 39.87% | 3e <sup>-112</sup> | <i>Postia placenta</i>     | F1SYH1.1         |
| g628.t1  | g628  | 513 | 40.64% | 2e <sup>-115</sup> | <i>Postia placenta</i>     | F1SYH1.1         |
| g8152.t1 | g8152 | 103 | 37.30% | 6e <sup>-17</sup>  | <i>Postia placenta</i>     | F1SYH1.1         |
| g1732.t1 | g1732 | 569 | 46.90% | 1e <sup>-151</sup> | <i>Postia placenta</i>     | F1SYH1.1         |
| g6524.t1 | g6524 | 532 | 47.88% | 5e <sup>-177</sup> | <i>Aspergillus oryzae</i>  | Q2UAZ8.1         |
| g2460.t1 | g2460 | 507 | 44.81% | 8e <sup>-147</sup> | <i>Aspergillus oryzae</i>  | Q2UAZ8.1         |
| g2458.t1 | g2458 | 103 | 50.00% | 7e <sup>-25</sup>  | <i>Postia placenta</i>     | F1SYH1.1         |
| g2453.t1 | g2453 | 529 | 46.28% | 2e <sup>-161</sup> | <i>Aspergillus oryzae</i>  | Q2UAZ8.1         |
| g2470.t1 | g2470 | 529 | 46.84% | 1e <sup>-164</sup> | <i>Aspergillus oryzae</i>  | Q2UAZ8.1         |
| g6539.t1 | g6539 | 527 | 48.88% | 6e <sup>-180</sup> | <i>Aspergillus oryzae</i>  | Q2UAZ8.1         |
| g3028.t1 | g3028 | 538 | 47.33% | 3e <sup>-144</sup> | <i>Postia placenta</i>     | F1SYH1.1         |
| g6570.t1 | g6570 | 658 | 41.33% | 3e <sup>-127</sup> | <i>Postia placenta</i>     | F1SYH1.1         |
| g6570.t2 |       | 670 | 41.39% | 7e <sup>-135</sup> | <i>Postia placenta</i>     | F1SYH1.1         |
| g1406.t1 | g1406 | 542 | 41.39% | 3e <sup>-123</sup> | <i>Postia placenta</i>     | F1SYH1.1         |
| g8882.t1 | g8882 | 542 | 41.39% | 3e <sup>-123</sup> | <i>Postia placenta</i>     | F1SYH1.1         |
| g1408.t1 | g1408 | 540 | 35.28% | 8e <sup>-109</sup> | <i>Coprinopsis cinerea</i> | A8NCK4.2         |
| g8883.t1 | g8883 | 540 | 35.28% | 8e <sup>-109</sup> | <i>Coprinopsis cinerea</i> | A8NCK4.2         |
| g1410.t1 | g1410 | 544 | 37.47% | 3e <sup>-114</sup> | <i>Coprinopsis cinerea</i> | A8NCK4.2         |
| g8885.t1 | g8885 | 544 | 37.47% | 2e <sup>-114</sup> | <i>Coprinopsis cinerea</i> | A8NCK4.2         |
| g1409.t1 | g1409 | 557 | 38.63% | 2e <sup>-116</sup> | <i>Postia placenta</i>     | F1SYH1.1         |
| g8884.t1 | g8884 | 566 | 38.63% | 3e <sup>-116</sup> | <i>Postia placenta</i>     | F1SYH1.1         |
| g1513.t1 | g1513 | 552 | 38.85% | 9e <sup>-119</sup> | <i>Postia placenta</i>     | F1SYH1.1         |
| g8204.t1 | g8204 | 560 | 35.91% | 3e <sup>-100</sup> | <i>Postia placenta</i>     | F1SY68.1         |
| g8381.t1 | g8381 | 507 | 36.57% | 1e <sup>-108</sup> | <i>Postia placenta</i>     | F1SY68.1         |
| g8408.t1 | g8408 | 510 | 39.13% | 3e <sup>-110</sup> | <i>Postia placenta</i>     | F1SYF1.1         |
| g4083.t1 | g4083 | 541 | 40.37% | 2e <sup>-125</sup> | <i>Postia placenta</i>     | F1SYF1.1         |
| g4087.t1 | g4087 | 544 | 40.20% | 2e <sup>-125</sup> | <i>Postia placenta</i>     | F1SYF1.1         |
| g4093.t1 | g4093 | 548 | 36.92% | 6e <sup>-114</sup> | <i>Postia placenta</i>     | F1SYF1.1         |
| g3247.t1 | g3247 | 499 | 35.20% | 2e <sup>-96</sup>  | <i>Postia placenta</i>     | F1SY68.1         |
| g3257.t1 | g3257 | 159 | 42.14% | 1e <sup>-36</sup>  | <i>Postia placenta</i>     | F1SYF1.1         |
| g3258.t1 | g3258 | 330 | 34.28% | 6e <sup>-59</sup>  | <i>Coprinopsis cinerea</i> | A8NCK4.2         |

|           |        |      |        |             |                                       |                  |
|-----------|--------|------|--------|-------------|---------------------------------------|------------------|
| g8131.t1  | g8131  | 805  | 31.56% | $1e^{-81}$  | <i>Armillaria gallica</i>             | A0A2H3C<br>ZX2.1 |
| g11201.t1 | g11201 | 697  | 51.74% | 0           | <i>Postia placenta</i>                | F1SY66.1         |
| g797.t1   | g797   | 529  | 36.35% | $5e^{-109}$ | <i>Postia placenta</i>                | F1SY62.1         |
| g9058.t1  | g9058  | 544  | 32.52% | $8e^{-73}$  | <i>Trichoderma virens</i>             | G9N4A8.1         |
| g6495.t1  | g6495  | 492  | 24.44% | $7e^{-26}$  | <i>Oryctolagus<br/>cuniculus</i>      | O02766.3         |
| g4660.t1  | g4660  | 99   | 36.78% | $1e^{-09}$  | <i>Bos taurus</i>                     | Q29626.1         |
| g9363.t1  | g9363  | 518  | 43.43% | $2e^{-150}$ | <i>Schizosaccharomyce<br/>s pombe</i> | O13820.3         |
| g10430.t1 | g10430 | 761  | 32.65% | $3e^{-120}$ | <i>Aspergillus<br/>fumigatus</i>      | B0Y6R2.1         |
| g10431.t1 | g10431 | 1101 | 35.61% | 0           | <i>Aspergillus<br/>fumigatus</i>      | B0Y6R2.1         |
| g3576.t1  | g3576  | 505  | 43.16% | $2e^{-128}$ | <i>Postia placenta</i>                | F1SYD1.1         |
| g3577.t1  | g3577  | 520  | 48.30% | $7e^{-160}$ | <i>Postia placenta</i>                | F1SYD1.1         |
| g3578.t1  | g3578  | 520  | 46.06% | $8e^{-158}$ | <i>Postia placenta</i>                | F1SYD1.1         |
| g3579.t1  | g3579  | 448  | 48.21% | $9e^{-152}$ | <i>Postia placenta</i>                | F1SYD1.1         |
| g3579.t2  | g3579  | 520  | 48.09% | $2e^{-159}$ | <i>Postia placenta</i>                | F1SYD1.1         |

---

A

>ITS of *I. hispidus*\_NPCB001

TTGGGCAACTTTCCTCCCGGTTTTTGAATGCTTAAGTTCAGCGGGTAGTCCTACCTGATTTGAGGTCAAAGGTGTCAGAGT  
TAAGGCCACTAAGGGTTCCTTGCTCATTGCAATTAACAAAAAGTAACGCGGACGATTAGAAGCAGACCCGTTAGGCAAGCG  
CTCCGGTGAAGCATAGCAATACTATTACACCATAAACGCGAACCAGTCCAGCTAATGCATTAAAGAGGAGCCGACAAAC  
CAAAGGCAATACAACAAAGCGTCGCCGGGCCAGCAATAACCTCCAAGTCCAAATCGCAAGTCAAGCCTACTTCAACCAA  
GAAGCAACATAATAAGACAAGCGATTTGAGATTAACACGACACTCAAACAGGCATGCCCTCGGAATACCAAGGGGCGC  
AAGGTGCGTTCAAAGATTCGATGATTCACTGAATTCTGCAATTACATTACTATCGCATTTCGCTGCGTTCTTCATCGATGCG  
AGAGCCTAGAGATCCGTTGTTGAAAGTTGTACAAATTATCGCCACAAAGGAGCATTACATTACATAACAATAAAGGGTTT  
GTAATACAACTAGTCGAAGCGTTCGCCTTCAACCTCTCTCTCTTAACGTTTTCGCCGTTTCAAACGTTGCAAGGCCTCAA  
AAGACCCTCTACTAGTATTGCTCGCAGTACTAGTTCGCAAGTCGAAAGTGTTACTACTACTAGCTTCAACCGGTTCAAAG  
GTGCACAGGGGTTTGAAATGGATTTGAGCACGAAAGCCGTGCACATGTGCGTTTCCGCACCAGCACAGGCCTCCGGCTTCA  
AAACTCGATAATGATCCTTCGAGTTCGCCCTCTCCAGAGAGAAGGGTTTTT

B

| select all 100 sequences selected   |                                                                                                                      | GenBank           | Graphics  | Distance tree of results | MSA Viewer  |         |            |          |            |
|-------------------------------------|----------------------------------------------------------------------------------------------------------------------|-------------------|-----------|--------------------------|-------------|---------|------------|----------|------------|
|                                     | Description                                                                                                          | Scientific Name   | Max Score | Total Score              | Query Cover | E value | Per. Ident | Acc. Len | Accession  |
| <input checked="" type="checkbox"/> | Inonotus hispidus clone SH2.107 small subunit ribosomal RNA gene, partial sequence; internal transcribed spacer...   | Inonotus hispidus | 1495      | 1495                     | 96%         | 0.0     | 98.81%     | 848      | MN699466.1 |
| <input checked="" type="checkbox"/> | Inonotus hispidus clone SH3.103 small subunit ribosomal RNA gene, partial sequence; internal transcribed spacer...   | Inonotus hispidus | 1478      | 1478                     | 96%         | 0.0     | 98.46%     | 850      | MN699467.1 |
| <input checked="" type="checkbox"/> | Inonotus hispidus clone SH1.105 small subunit ribosomal RNA gene, partial sequence; internal transcribed spacer...   | Inonotus hispidus | 1472      | 1472                     | 96%         | 0.0     | 98.34%     | 848      | MN699464.1 |
| <input checked="" type="checkbox"/> | Inonotus hispidus clone SH3.104 small subunit ribosomal RNA gene, partial sequence; internal transcribed spacer...   | Inonotus hispidus | 1471      | 1471                     | 94%         | 0.0     | 98.79%     | 845      | MN699468.1 |
| <input checked="" type="checkbox"/> | Inonotus hispidus clone SH1.108 small subunit ribosomal RNA gene, partial sequence; internal transcribed spacer...   | Inonotus hispidus | 1458      | 1458                     | 93%         | 0.0     | 98.90%     | 850      | MN699465.1 |
| <input checked="" type="checkbox"/> | Inonotus hispidus isolate IH50 small subunit ribosomal RNA gene, partial sequence; internal transcribed spacer 1,... | Inonotus hispidus | 1452      | 1452                     | 94%         | 0.0     | 98.54%     | 845      | MW074175.1 |
| <input checked="" type="checkbox"/> | Inonotus hispidus strain RWB01 internal transcribed spacer 1, partial sequence; 5.8S ribosomal RNA gene and int...   | Inonotus hispidus | 1450      | 1450                     | 92%         | 0.0     | 99.13%     | 822      | MK934344.1 |
| <input checked="" type="checkbox"/> | Inonotus hispidus strain ML21KP1 internal transcribed spacer 1, partial sequence; 5.8S ribosomal RNA gene and...     | Inonotus hispidus | 1439      | 1439                     | 92%         | 0.0     | 98.88%     | 806      | KX881610.1 |

C

Inonotus hispidus clone SH2.107 small subunit ribosomal RNA gene, partial sequence; internal transcribed spacer 1, 5.8S ribosomal RNA gene, and internal transcribed spacer 2, complete sequence; and large subunit ribosomal RNA gene, partial sequence

Sequence ID: [MN699466.1](#) Length: 848 Number of Matches: 1

| Range 1: 7 to 846 |                                                               | GenBank      | Graphics  | Next Match | Previous Match |
|-------------------|---------------------------------------------------------------|--------------|-----------|------------|----------------|
| Score             | Expect                                                        | Identities   | Gaps      | Strand     |                |
| 1495 bits(809)    | 0.0                                                           | 831/841(99%) | 4/841(0%) | Plus/Minus |                |
| Query 14          | CTCCCGCTTTTGA--ATGCTTAAGTTCAGCGGGTAGTCCTACCTGATTTGAGGTCAA     | 72           |           |            |                |
| Subjct 846        | CTCCCGC-TTTATTGATAGCTTAAGTTCAGCGGGTAGTCCTACCTGATTTGAGTCAA     | 788          |           |            |                |
| Query 73          | GGTGTGAGAGTTAAGGCCACTAAGGGTTCCTTGCTCTATTGCAATTAACAAAAAGTAAGCG | 132          |           |            |                |
| Subjct 787        | GGTGTGAGAGTTAAGGCCACTAAGGGTTCCTTGCTCTATTGCAATTAACAAAAAGTAAGCG | 728          |           |            |                |
| Query 133         | GGAGGATTAGAGCAGACCGTTAGGCAAGCGCTCCGGTGAAGCATAGCAATACTATTAC    | 192          |           |            |                |
| Subjct 727        | GGAGGATTAGAGCAGACCGTTAGGCAAGCGCTCCGGTGAAGCATAGCAATACTATTAC    | 668          |           |            |                |
| Query 193         | ACCATAAAAACCGCAACCAAGTCCAGCTAATGCATTAAAGAGGAGCGCAAAACAAAGG    | 252          |           |            |                |
| Subjct 667        | ACCATAAAAACCGCAACCAAGTCCAGCTAATGCATTAAAGAGGAGCGCAAAACAAAGG    | 608          |           |            |                |
| Query 253         | GCAATACAAACAAAGCGTCCCGGGCCAGCAATAACCTCCAAGTCCAATCGCAAGTCAA    | 312          |           |            |                |
| Subjct 607        | GCAATACAAACAAAGCGTCCCGGGCCAGCAATAACCTCCAAGTCCAATCGCAAGTCAA    | 548          |           |            |                |
| Query 313         | GCCTACTTCAACCAAGAGCAACATAATAAAGACAAGCGATTGAGATTAAACAGCAC      | 372          |           |            |                |
| Subjct 547        | GCCTACTTCAACCAAGAGCAACATAATAAAGACAAGCGATTGAGATTAAACAGCAC      | 488          |           |            |                |
| Query 373         | TCAAACAGCATGCCCCCGGAATACCAAGGGGCGCAAGGTGCGTTCAAAGATTGATGA     | 432          |           |            |                |
| Subjct 487        | TCAAACAGCATGCCCCCGGAATACCAAGGGGCGCAAGGTGCGTTCAAAGATTGATGA     | 428          |           |            |                |
| Query 433         | TTCACTGAATTCTGCAATTACATTACTTATGCAATTTCGCTGCGTTCTTCATGATGCG    | 492          |           |            |                |
| Subjct 427        | TTCACTGAATTCTGCAATTACATTACTTATGCAATTTCGCTGCGTTCTTCATGATGCG    | 368          |           |            |                |
| Query 493         | AGAGCCTAGAGATCGTTGTTGAAAAGTTGTACAAATTATGCCCCACAAGGAGCATTACAT  | 552          |           |            |                |
| Subjct 367        | AGAGCCTAGAGATCGTTGTTGAAAAGTTGTACAAATTATGCCCCACAAGGAGCATTACAT  | 308          |           |            |                |
| Query 553         | TCACATAACAATAAAGGGTTTGTAAATACAACTAGTCGAAGCGTTGCGCTTCAACCTCT   | 612          |           |            |                |
| Subjct 307        | TCACATAACAATAAAGGGTTTGTAAATACAACTAGTCGAAGCGTTGCGCTTCAACCTCT   | 248          |           |            |                |
| Query 613         | CTTCTCTTAAGTTTCCCGCTTTCAGAGTTTCAAGGGCTCAAAAGACCTCCTACTA       | 672          |           |            |                |
| Subjct 247        | CTTCTCTTAAGTTTCCCGCTTTCAGAGTTTCAAGGGCTCAAAAGACCTCCTACTA       | 188          |           |            |                |

Figure S1. ITS alignment of the strain NPCB\_001.

A. ITS sequence of the strain NPCB\_001. B. Comparison results of ITS of the strain NPCB\_001 based on NCBI blastP. C. The ITS of strain NWAUFU-1 was aligned to *Inonotus hispidus* clone SH2.107 (MN699466.1).

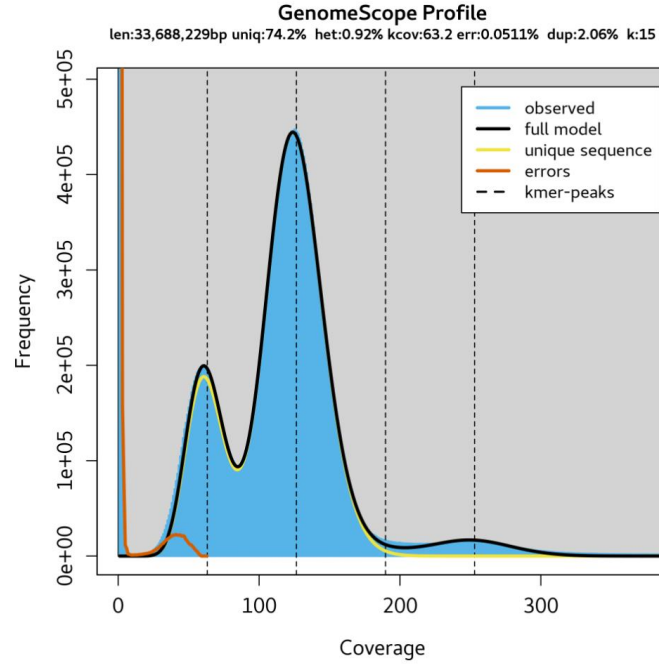

**Figure S2. *K*-mer Depth and *K*-mer Species Frequency Distribution Plot.**

The blue line represents the actual *K*-mer curve, the black line is the *k*-mer curve estimated by the model, the yellow line is the *K*-mer curve corresponding to the unique data, the red line represents the error curve due to sequencing errors, and the dashed line represents speculation *K*-mer peak. Using the reads obtained by sequencing, *K*-mer-based analysis was used to estimate the genome size and heterozygosity. A *K*-mer refers to a sequence of *K* bp in length. Iteratively select a sequence of length *K* bases from a continuous sequence. If the length of the sequence is *L* and the length of the *K*-mer is *K*, then *L*-*K*+1 *K*-mers can be obtained. We take *K*-mers for the reads obtained by sequencing, and then count the frequency of each *K*-mer. According to the Lander waterman algorithm, the genome size (*G*) satisfies the following formula:

$$C_{base} = C_{k-mer} \times \frac{L}{L - K + 1}$$

$$G = \frac{n_{k-mer}}{C_{k-mer}} = \frac{n_{base}}{C_{base}}$$

$C_{base}$  and  $C_{k-mer}$  are the expected depth of coverage and *K*-mer, and  $n_{base}$  and  $n_{k-mer}$  are the total number of bases and the total number of *K*-mers in the sequence. In the case of a certain amount of data, the depth frequency of *K*-mer is subject to Poisson distribution, so the peak of the *K*-mer depth frequency distribution is the corresponding depth, which is used as an estimate of the expected depth of *K*-mer.

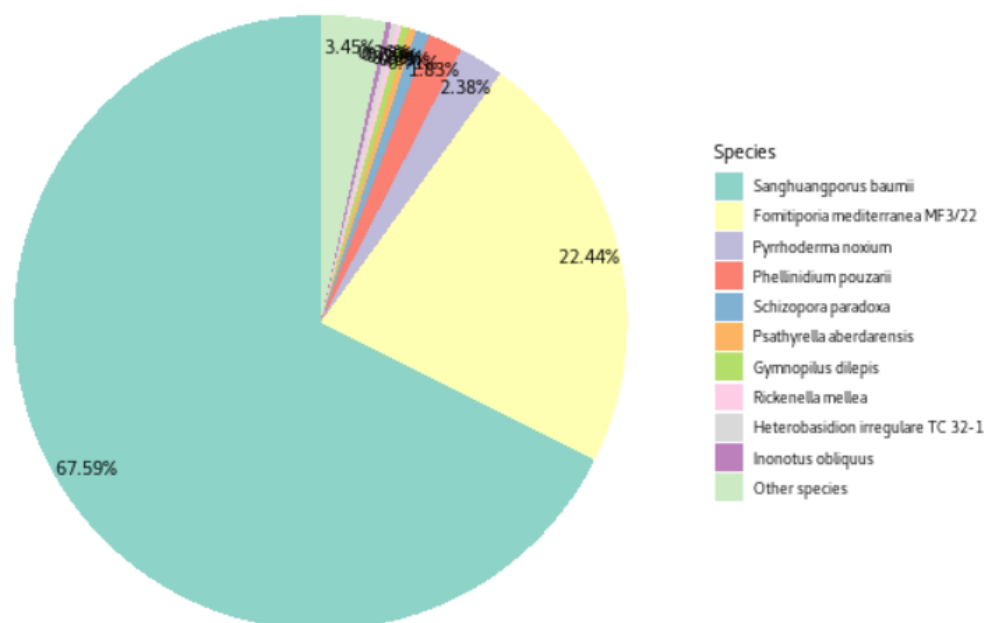

**Figure S3. Species distribution map of Nr database alignment to sequences.**

According to the results of the Nr library match, the top 10 species were counted and the rest were classified as other species, and the distribution of these species was mapped according to their proportion.

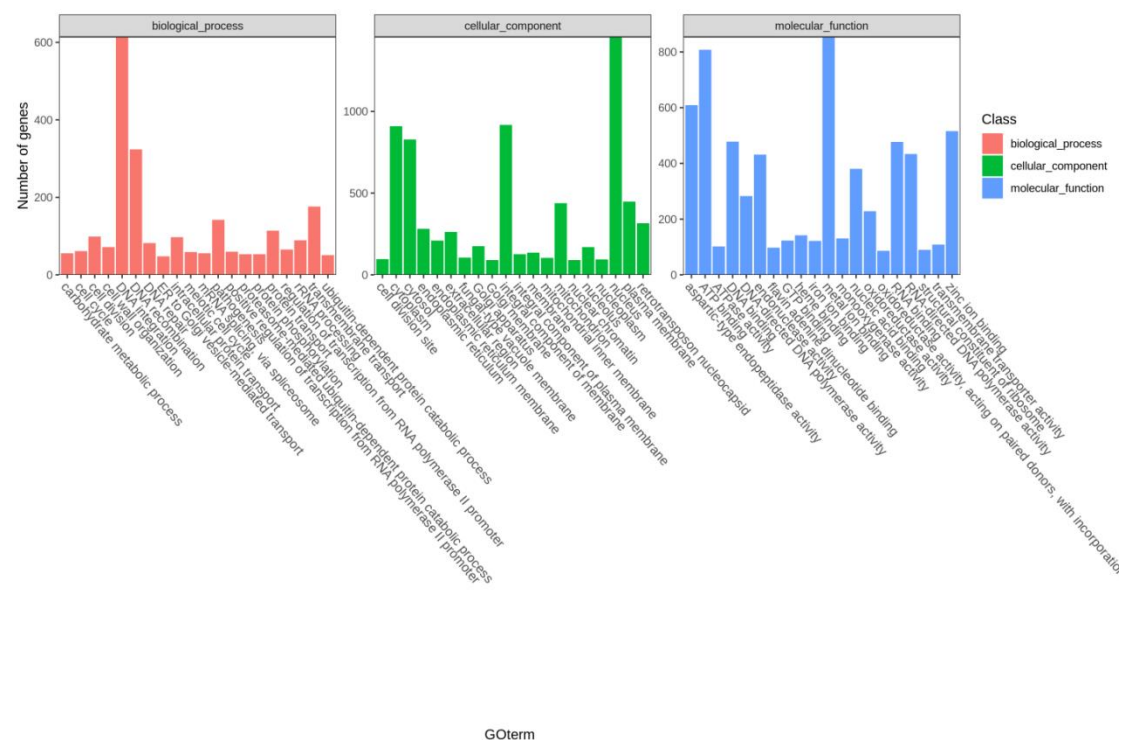

**Figure S4. Statistical map of functional annotation classification based on Gene Ontology database.**



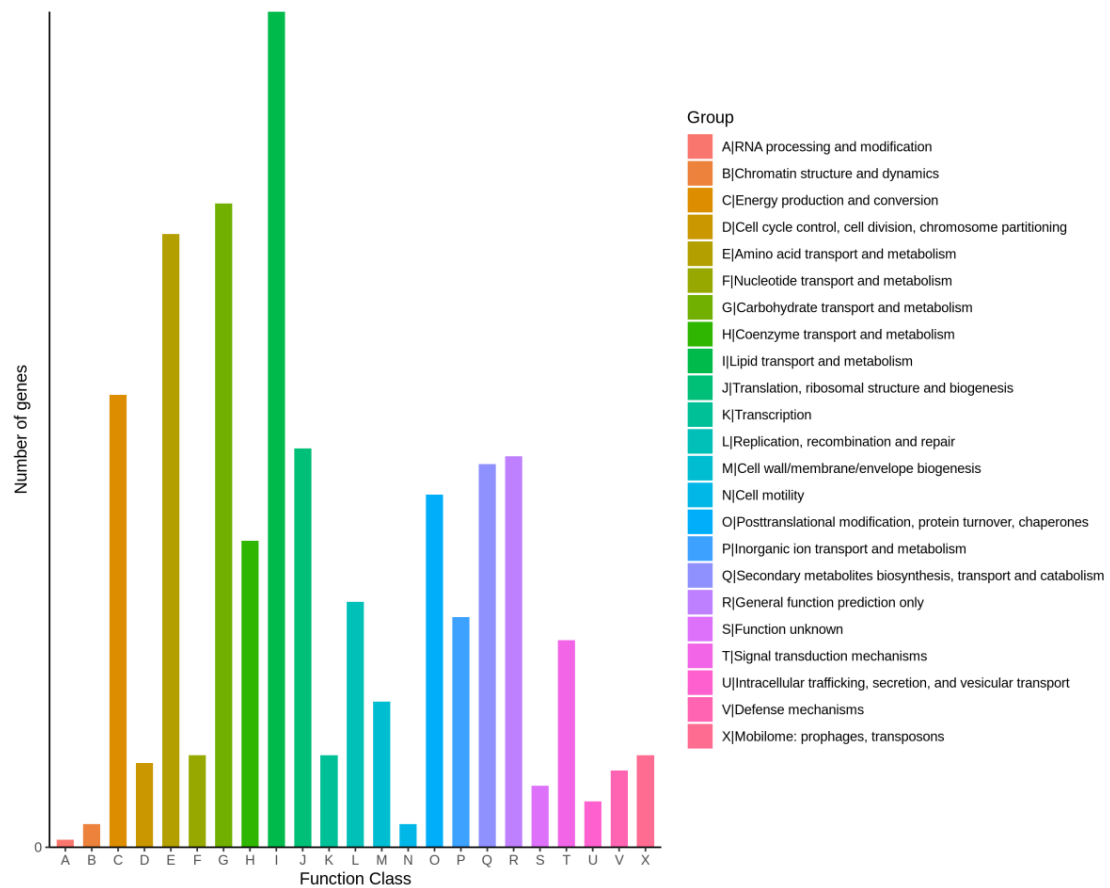

**Figure S5. Statistical Chart of COG Functional Annotated Classification.**

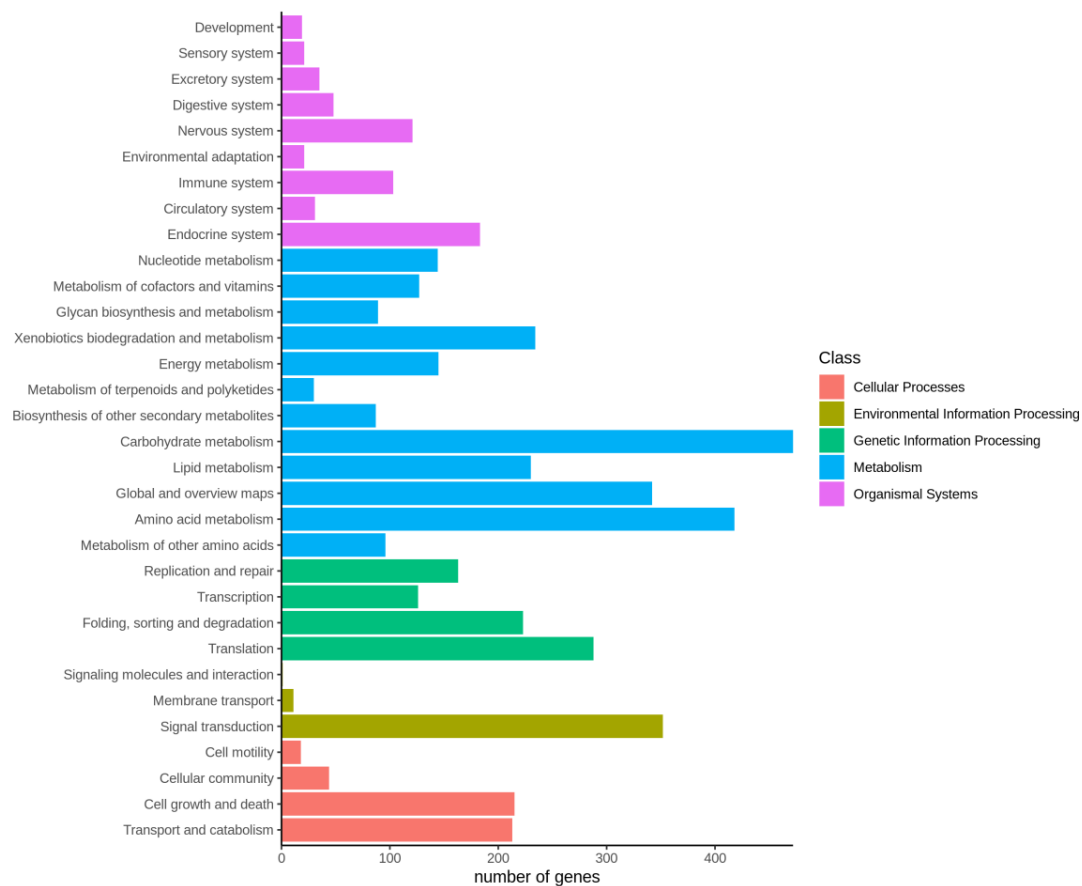

**Figure S6. KEGG Pathway Functional Classification Chart.**

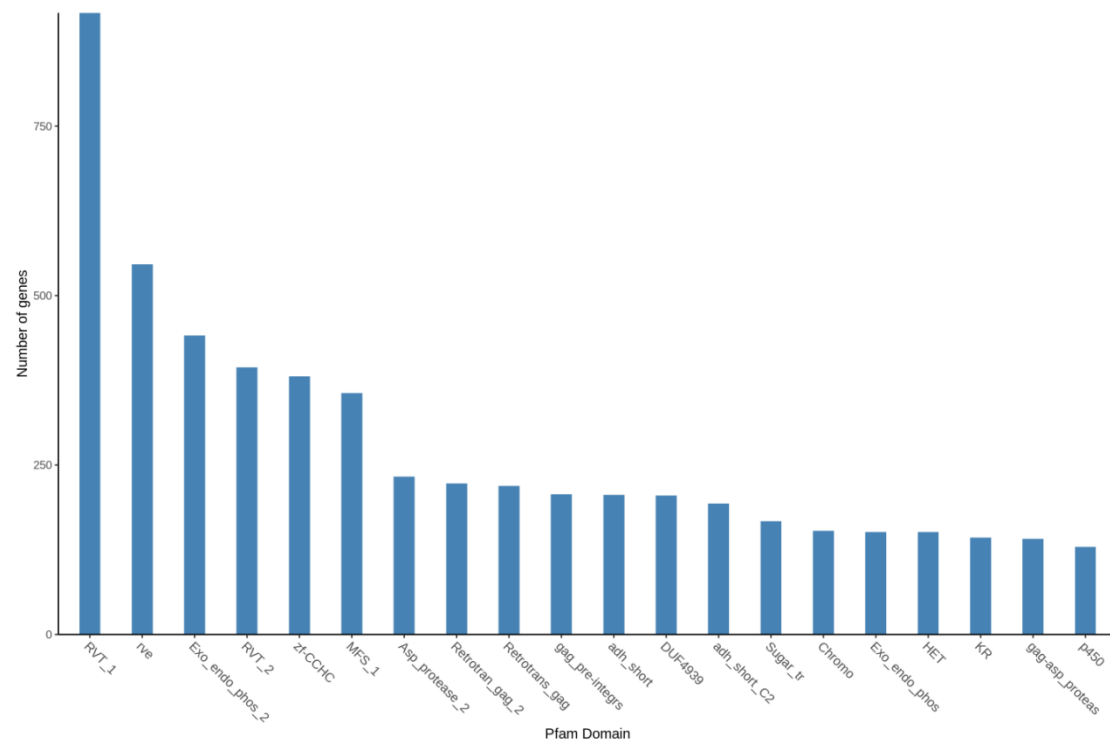

**Figure S7. Domain annotation based on the Pfam database.**

Statistical summaries of genes annotated for each domain are made and the top 20 most annotated domains are plotted.





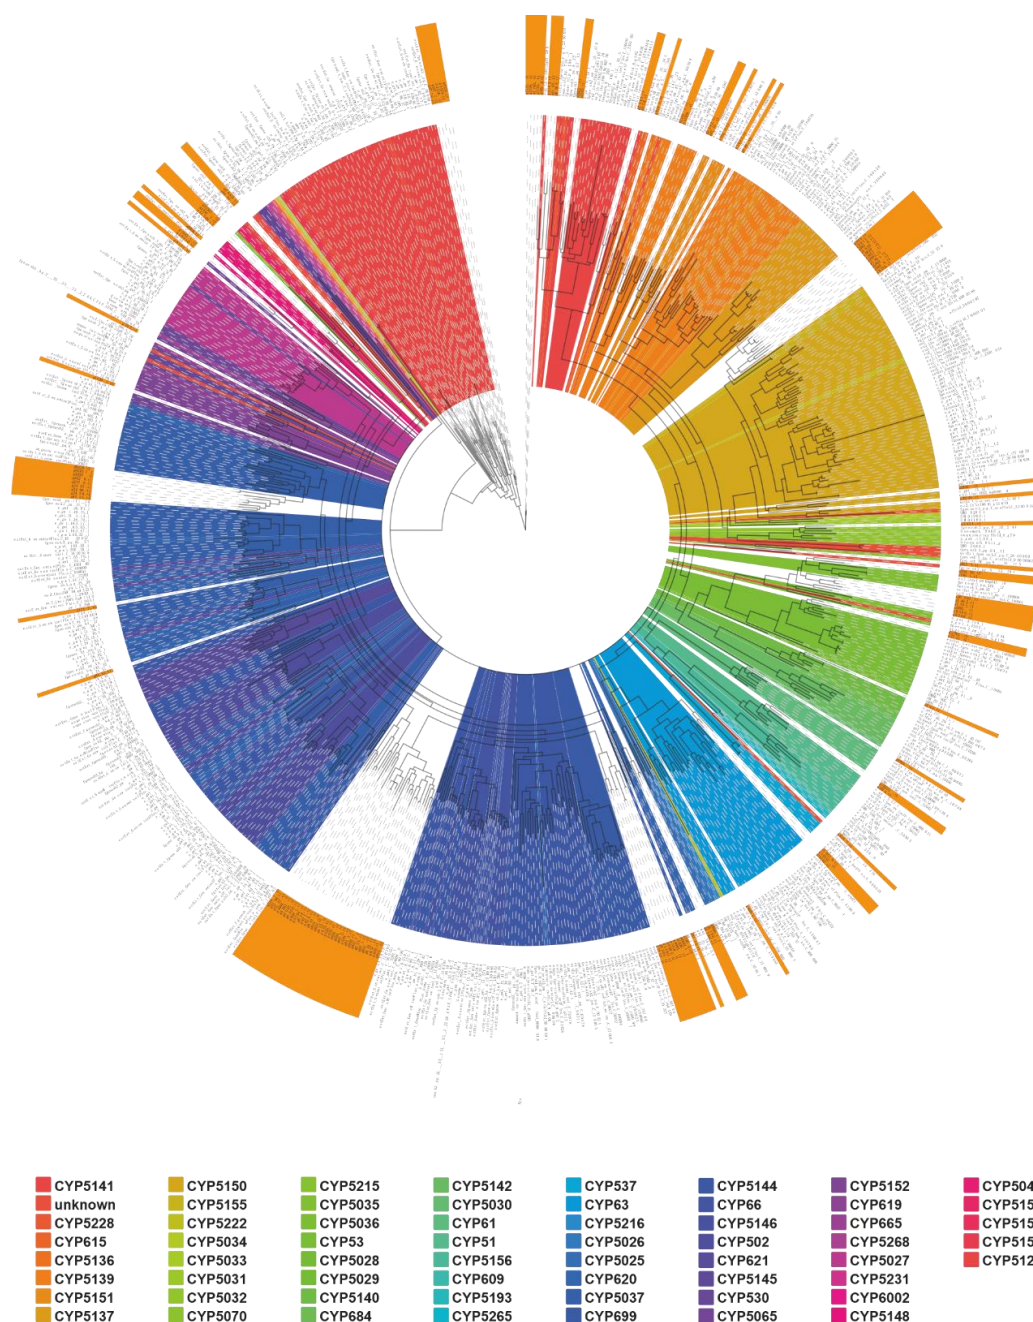

**Figure S10. P450s Cluster analysis of the strain *I. hispidus* NPCB\_001 and other Basidiomycetes.**

The sequences of the branch with color background and the corresponding sequence name without background are from Fungal Cytochrome P450 Database (<http://passport.riceblast.snu.ac.kr/?t=P450>). The background color of the branch corresponds to the category to which it belongs. The sequences with dark green background and corresponding branch without background are P450 sequences from *I. hispidus* NPCB\_001. Multiple sequence pairs are implemented with mafft[3] v7.505 with parameters --maxiterate 1000 --localpair. The evolutionary tree was constructed by IQtree[4] v2.2.3 with the parameters -m MFP -bb 1000 -alrt 1000 -abays -nt AUTO.

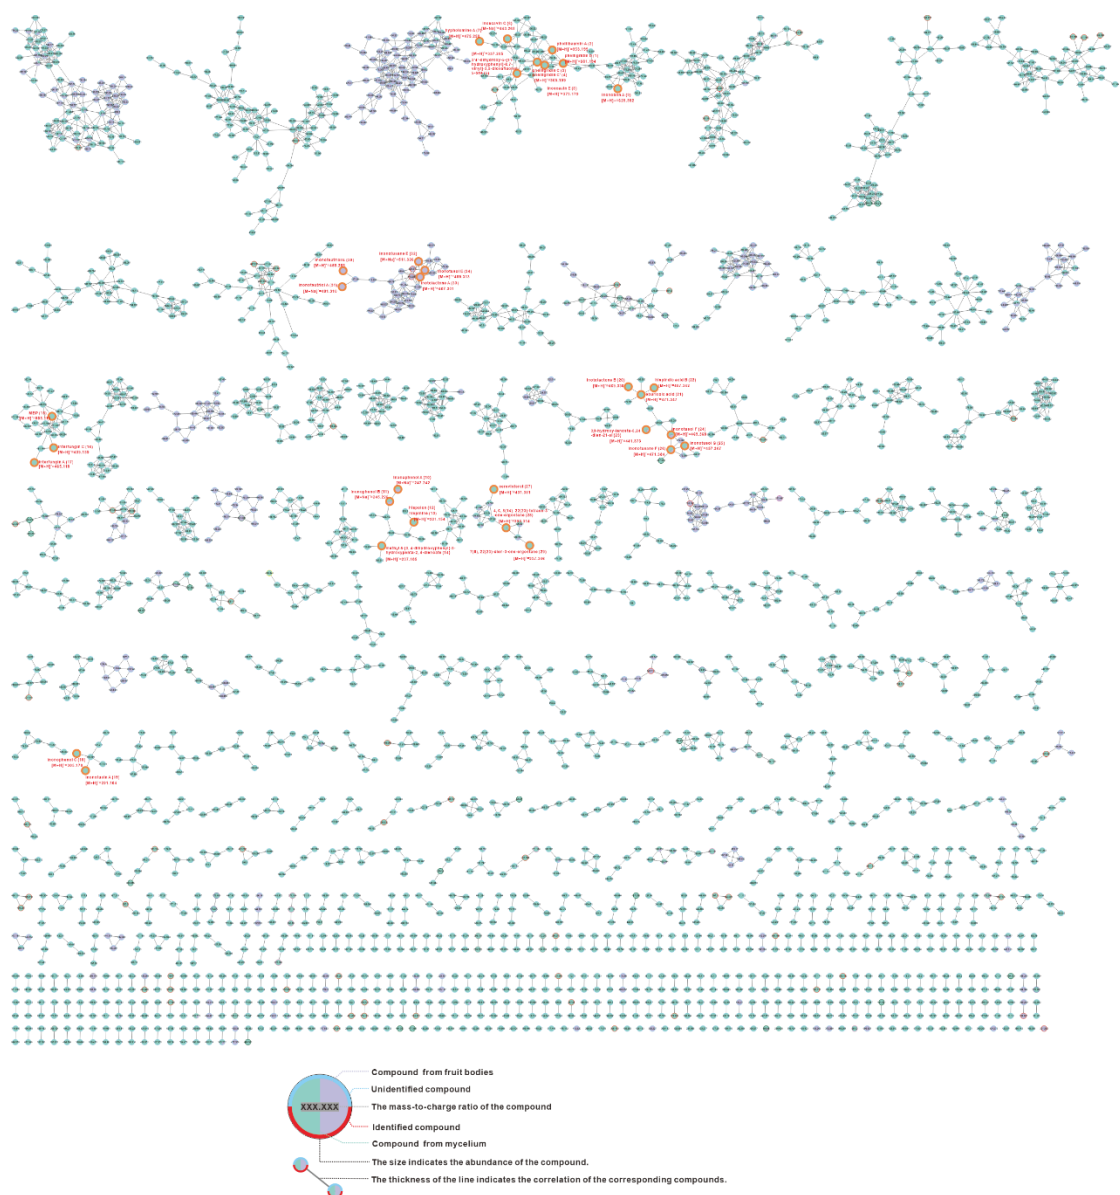

**Figure S11. Molecular network analysis of metabolites from the mycelium and fruiting bodies of the strain *I. hispidus* NPCB\_001.**



1

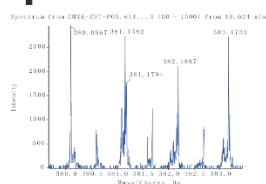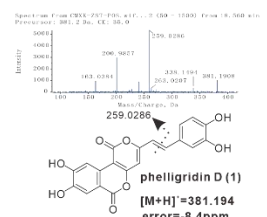

2

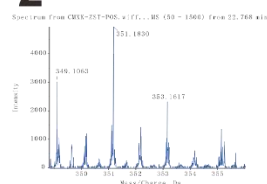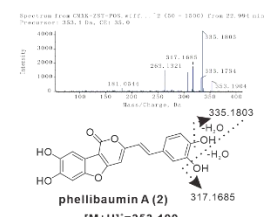

3/4

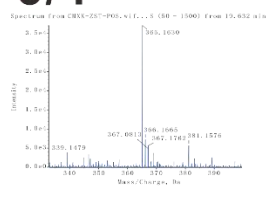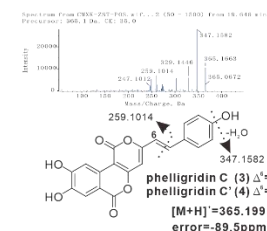

5

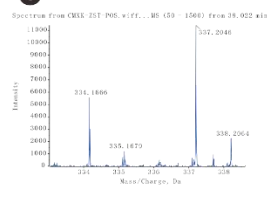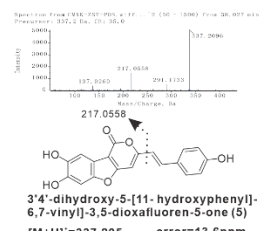

6

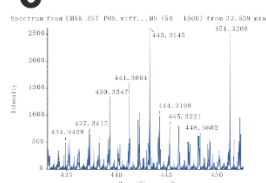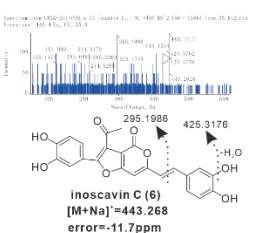

7

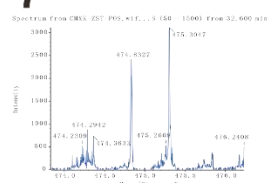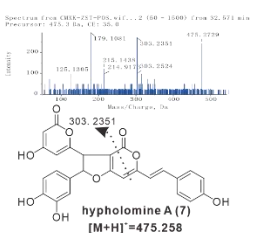

8

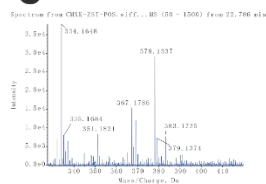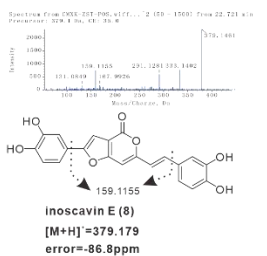

9

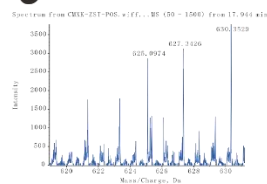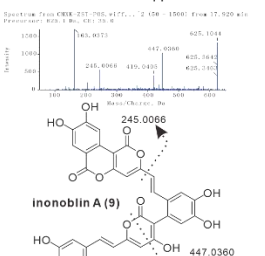

10

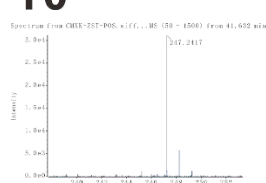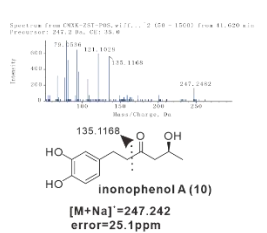

11

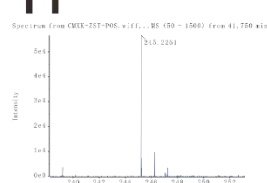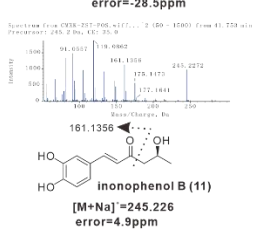

12

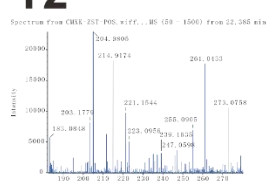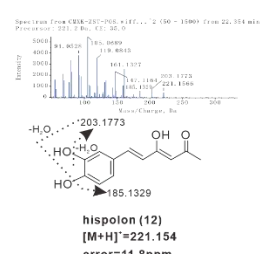

13

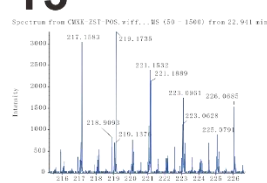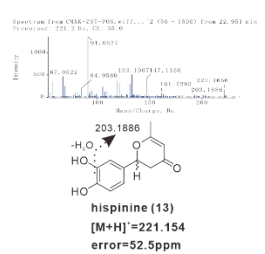



14

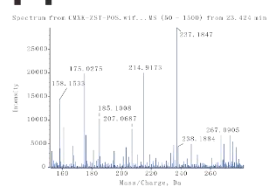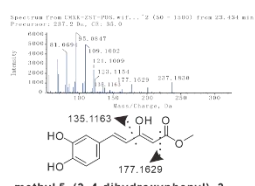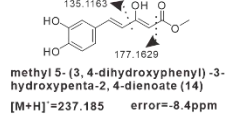

15

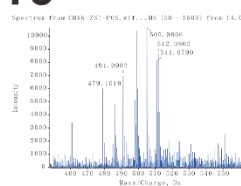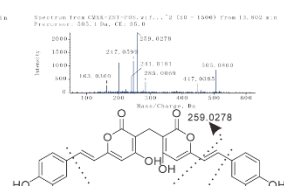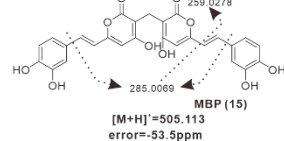

16

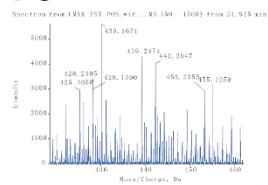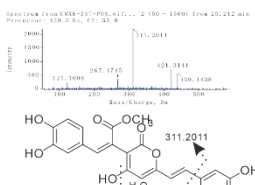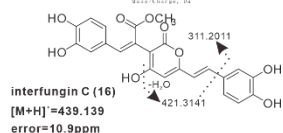

17

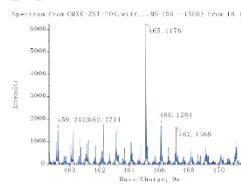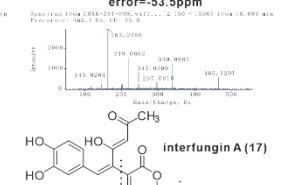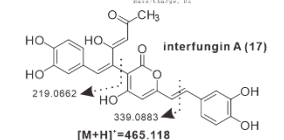

18

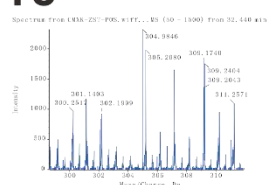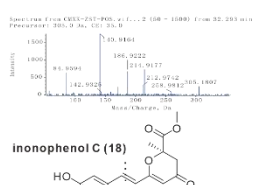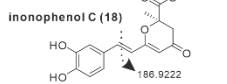

19

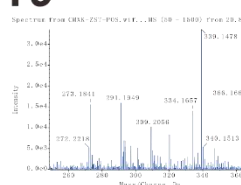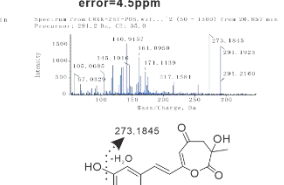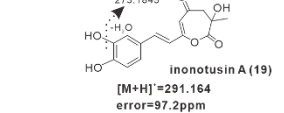

20

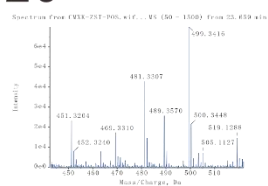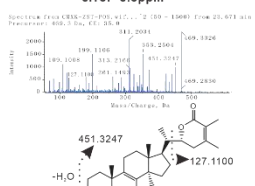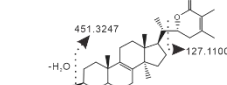

21

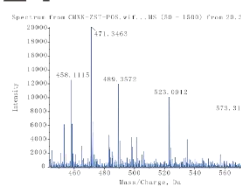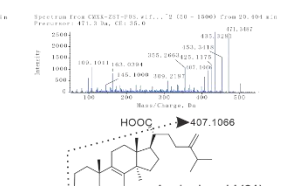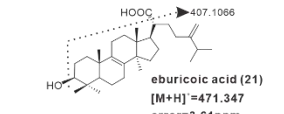

22

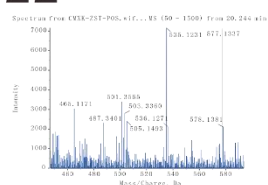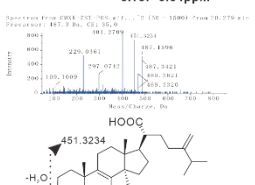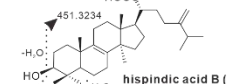

23

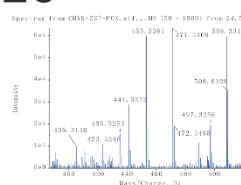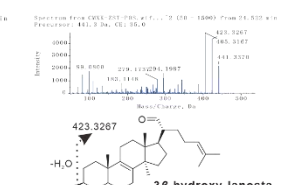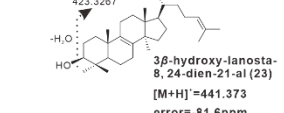

24

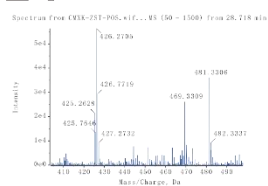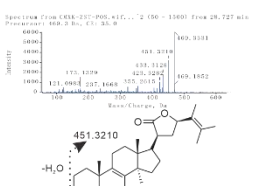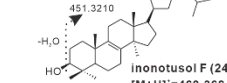

25

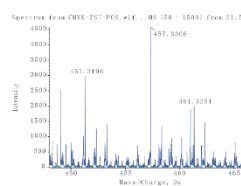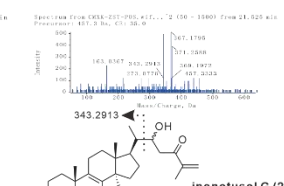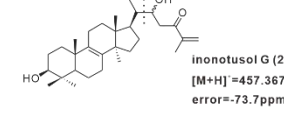

26

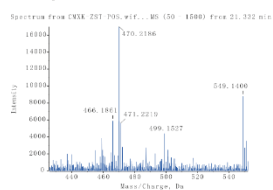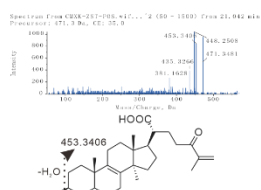

27

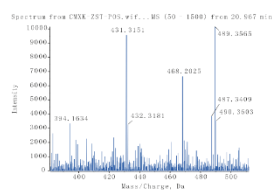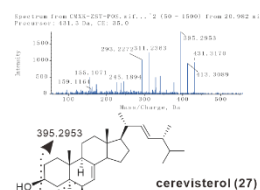

28

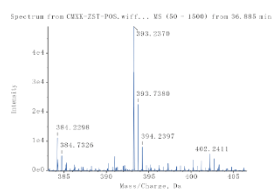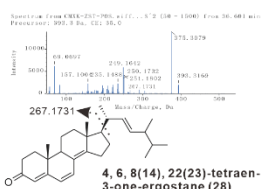

29

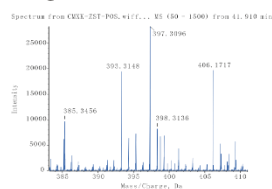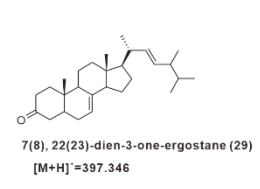

30

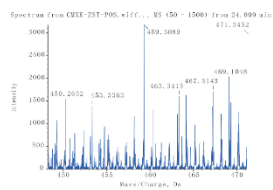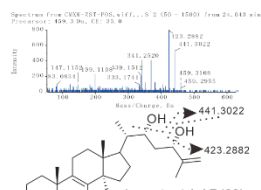

31

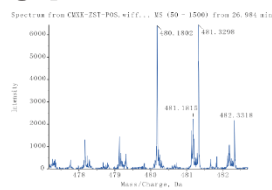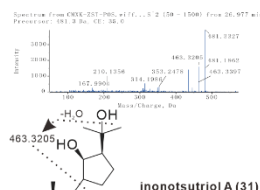

32

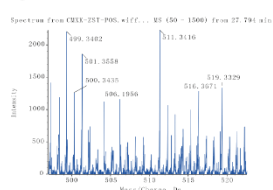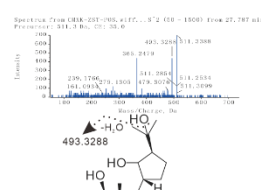

33

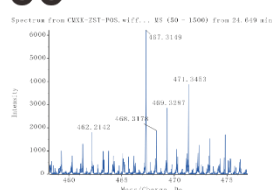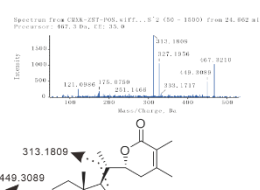

34

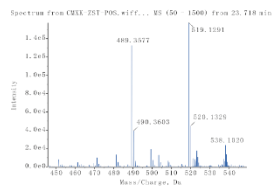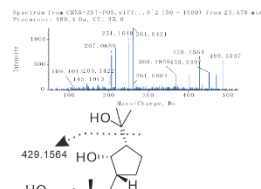

**Figure S12. The LC-ESI-HRMS and LC-ESI-HRMS/MS spectrums of isolates from the strain *I. hispidus* NPCB\_001.**

Mass spectral data were acquired in positive ion mode. The spectrum numbers correspond to the compound numbers in the manuscript.

## Reference

1. Tsunematsu, Y., et al., *Genomic Mushroom Hunting Decrypts Coprinoferrin, A Siderophore Secondary Metabolite Vital to Fungal Cell Development*. Organic Letters, 2019. **21**(18): p. 7582-7586.
2. Gilchrist, C.L.M. and Y.-H. Chooi, *clinker & clustermmap.js: automatic generation of gene cluster comparison figures*. Bioinformatics, 2021. **37**(16): p. 2473-2475.
3. Nakamura, T., et al., *Parallelization of MAFFT for large-scale multiple sequence alignments*. Bioinformatics, 2018. **34**(14): p. 2490-2492.
4. Minh, B.Q., et al., *IQ-TREE 2: New Models and Efficient Methods for Phylogenetic Inference in the Genomic Era*. Molecular Biology and Evolution, 2020. **37**(5): p. 1530-1534.
